# Supplementary material for: Chiral and random arrangements of flavin chromophores along cyclic peptide nanotubes on gold influencing differently on surface potential and piezoelectricity
Source: Royal Society of Chemistry journal article supplement (doi:10.1039/c8ra10466b), 2019-01-01
Supplement: c8ra10466b1.pdf [file c8ra10466b1.pdf]

Supporting Information for

**Chiral and random arrangements of flavin chromophores along cyclic peptide nanotubes on gold influencing differently on surface potential and piezoelectricity**

Yusuke Kamano, Yuki Tabata, Hiroataka Uji, and Shunsaku Kimura

Department of Material Chemistry, Graduate School of Engineering, Kyoto University,  
Kyoto-Daigaku Katsura, Nishikyo-ku, Kyoto 615-8510, Japan

## 1. Synthesis section

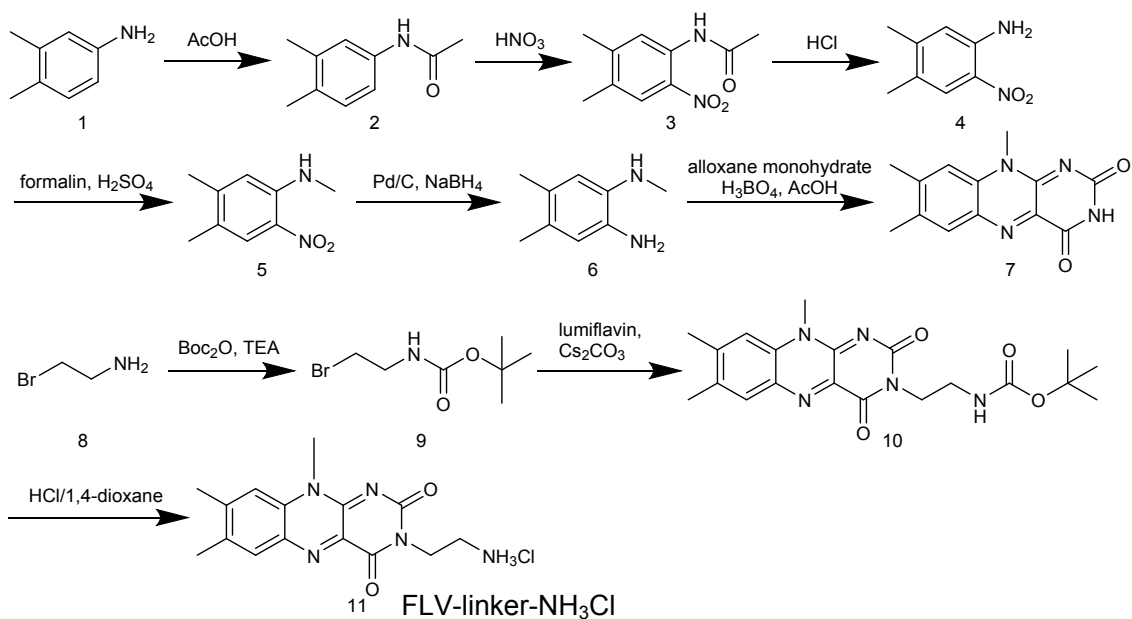

**Scheme 1.** Synthetic schemes for FLV-linker-NH<sub>3</sub>Cl. Compound 2, 3, and 4 were synthesized according to ref S1, compound 5, 6, and 7 were according to ref S2, compound 9 was according to ref S3, and compound 10 was according to ref S4 and S5.

### *N*-(3,4-dimethylphenylene)acetamide (2)

3,4-dimethylaniline (1) (11.284 g, 93.11 mmol) was dissolved in AcOH (27 mL) and refluxed and stirred under Ar for 3 h. The mixture was cooled to room temperature and poured into cold water. The mixture was centrifuged and the precipitate was washed with water. The residue was recrystallized from hot MeOH/water (1/6 = v/v) to afford *N*-(3,4-dimethylphenylene)acetamide (2) (11.673 g, 71.51 mmol, yield 77 %).

<sup>1</sup>H-NMR (400 MHz, CDCl<sub>3</sub>): δ (ppm) 2.15 (s, 3H, COCH<sub>3</sub>), 2.21, 2.24 (s, 6H, aromatic CH<sub>3</sub>) 7.05–7.07, 7.18–7.21, 7.27 (d, d, s, 3H, aromatic), 7.10 (br, 1H, amide)

### *N*-(2-nitro-4,5-dimethylphenyl)acetamide (3)

*N*-(3,4-dimethylphenylene)acetamide (2) (11.673 g, 71.52 mmol) was dissolved in AcOH (50 mL). HNO<sub>3</sub> (4 mL) was dropwised to the solution while stirred intensively. Then, H<sub>2</sub>SO<sub>4</sub> (3 mL) was dropwised to the solution and stirred at -10°C with ice/NaCl. The solution was stirred at room temperature for 24 h. The reaction mixture was poured into crashed ice and the precipitate was filtered off. This precipitate was washed with water to afford *N*-(2-nitro-4,5-dimethylphenyl)acetamide (3) (2.975 g, 14.29 mmol, yield 20 %).

<sup>1</sup>H-NMR (400 MHz, CDCl<sub>3</sub>): δ (ppm) 2.27, 2.34 (s, 6H, COCH<sub>3</sub>, aromatic CH<sub>3</sub>), 7.97, 8.53 (s, 2H, aromatic), 10.29 (s, 1H, amide).

#### **2-nitro-4,5-dimethylaniline (4)**

*N*-(2-nitro-4,5-dimethylphenyl)acetamide (3) (2.975 g, 14.29 mmol) was dissolved in MeOH (70 mL) and concd. HCl aq. (30 mL) was added to the solution. The mixture was stirred at 80°C for 2 h. Then, this mixture was cooled to room temperature and adjusted to pH 10 with sat. NaHCO<sub>3</sub> aq. Thereafter, the product was extracted with AcOEt and the solvent was removed under reduced pressure to afford 2-nitro-4,5-dimethylaniline (4) (2.297 g, 13.82 mmol, yield 97 %).

<sup>1</sup>H-NMR (400 MHz, CDCl<sub>3</sub>):δ (ppm) 2.18, 2.22 (s, 6H, aromatic CH<sub>3</sub>), 5.90 (s, 2H, amine), 6.59, 7.87 (s, 2H, aromatic).

#### ***N*,4,5-trimethyl-2-nitroaniline (5)**

2-nitro-4,5-dimethylaniline (4) (2.000 g, 12.04 mmol) was dissolved in H<sub>2</sub>SO<sub>4</sub> (20 mL). Formalin (20 mL) was dropwisely added to the solution and stirred at room temperature for 3 h. Then, the reaction mixture was heated and stirred at 70°C for 3 h. The resulting mixture was poured into water and the solid was collected by filtration and dissolved in AcOEt. The solution was washed with sat. NaHCO<sub>3</sub> aq. three times and dried over MgSO<sub>4</sub>. The solvent was removed under reduced pressure to afford *N*,4,5-trimethyl-2-nitroaniline (5) (1.539 g, 8.54 mmol, 71 %).

<sup>1</sup>H-NMR (400 MHz, CDCl<sub>3</sub>):δ (ppm) 2.18, 2.28 (s, 6H, aromatic CH<sub>3</sub>), 3.00 (s, 3H, NH), 6.61, 7.93 (s, 2H, aromatic).

#### **Lumiflavin (7)**

*N*,4,5-trimethyl-2-nitroaniline (5) (4.003 g, 22.20 mmol) was dissolved in MeOH and then, Pd/C (4 %, 500 mg) and NaBH<sub>4</sub> (2.549 g, 67.38 mmol) was added to the mixture. The mixture was stirred at room temperature for 2 h under Ar atmosphere. The reaction mixture was filtered and the filtrate was evaporated. Obtained residue was used in the next step without further purification. Reduced product, alloxane monohydrate (10.682 g, 66.76 mmol) and H<sub>3</sub>BO<sub>4</sub> (3.501 g, 45.00 mmol) in AcOH (300 mL) was stirred at room temperature for 18 h under Ar atmosphere. The formed precipitate was centrifuged and washed with AcOH, MeOH, diethyl ether in this order to afford lumiflavin (7) (2.364 g, 9.23 mmol, 42%).

<sup>1</sup>H-NMR (400 MHz, TFA-*d*):δ (ppm) 2.51, 2.63 (s, 6H, aromatic CH<sub>3</sub>), 4.17 (s, 3H, NCH<sub>3</sub>), 7.75, 8.16 (s, 2H, aromatic).

#### **tert-butyl (2-bromoethyl)carbamate (9)**

Boc<sub>2</sub>O (1.075 g, 4.84 mmol) was dissolved in CH<sub>2</sub>Cl<sub>2</sub> (26 mL) and 2-bromoethylamine hydrobromide (8) (393 mg, 3.38 mmol) was added to the mixture at 0°C. Then, TEA (960 μL, 6.88

mmol) was dropwised at 0°C and stirred for 10 min. The reaction mixture was stirred at room temperature for 18 h. The mixture was washed with 4 % KHSO<sub>4</sub> three times, sat. NaHCO<sub>3</sub> aq. three times and brine. The organic layer was dried over Na<sub>2</sub>SO<sub>4</sub> and the solvent was removed under reduced pressure to afford tert-butyl (2-bromoethyl)carbamate (9).

<sup>1</sup>H-NMR (400 MHz, CDCl<sub>3</sub>):δ (ppm) 1.45 (s, 9H, Boc), 3.44–3.47, 3.52–3.54 (m 4H, CH<sub>2</sub> CH<sub>2</sub>), 4.93 (br, 1H, CH<sub>2</sub>CH<sub>2</sub>NH).

#### **FLV-linker-Boc (10)**

Lumiflavin (7) (806 mg, 3.15 mmol) and Cs<sub>2</sub>CO<sub>3</sub> (1.522 g, 4.67 mmol) was suspended in dry DMF (50 mL). To the suspension, molecular sieves 20 Å was added. Thereafter, tert-butyl (2-bromoethyl)carbamate (9) (1050 mg, 4.68 mmol) in dry DMF (10 mL) was dropwised to the suspension and stirred at room temperature for 20 h under Ar atmosphere. Undissolved part was filtered off, and then, the solvent was removed under reduced pressure. The residue was dissolved in CHCl<sub>3</sub> and washed with water. The organic layer was dried over Na<sub>2</sub>SO<sub>4</sub> and the solvent was removed under reduced pressure. The residue was purified by column chromatography (silica gel, eluent: CHCl<sub>3</sub>/MeOH = 20/1 v/v) to afford FLV-linker-Boc (10) (332 mg, 0.83mmol, 27 %).

<sup>1</sup>H-NMR (400 MHz, CDCl<sub>3</sub>):δ (ppm) 1.37 (s, 9H, Boc), 2.46, 2.56 (s, 2H, aromatic CH<sub>3</sub>), 3.52–3.53 (m, 2H, CH<sub>2</sub>CH<sub>2</sub>NH), 4.13 (s, 3H, NCH<sub>3</sub>), 4.32 (m, 2H, CH<sub>2</sub>CH<sub>2</sub>NH ), 5.15 (br, 1H, amide), 7.43, 8.08 (s, 2H, aromatic).

ESI-MS *m/z* : [M+Na]<sup>+</sup> calcd. for C<sub>20</sub>H<sub>25</sub>N<sub>5</sub>O<sub>4</sub>, 422.1799 ; found, 422.1789.

#### **FLV-linker NH<sub>3</sub>Cl (11)**

FLV-linker-Boc (10) (90 mg, 0.22 mmol) was dissolved in 1,4-dioxane (3 mL) and 4 M HCl in 1,4-dioxane (40 mL) was dropwised to the solution. The mixture was stirred for 2 h and the solvent was removed under reduced pressure. Obtained product was used in the next step without further purification.

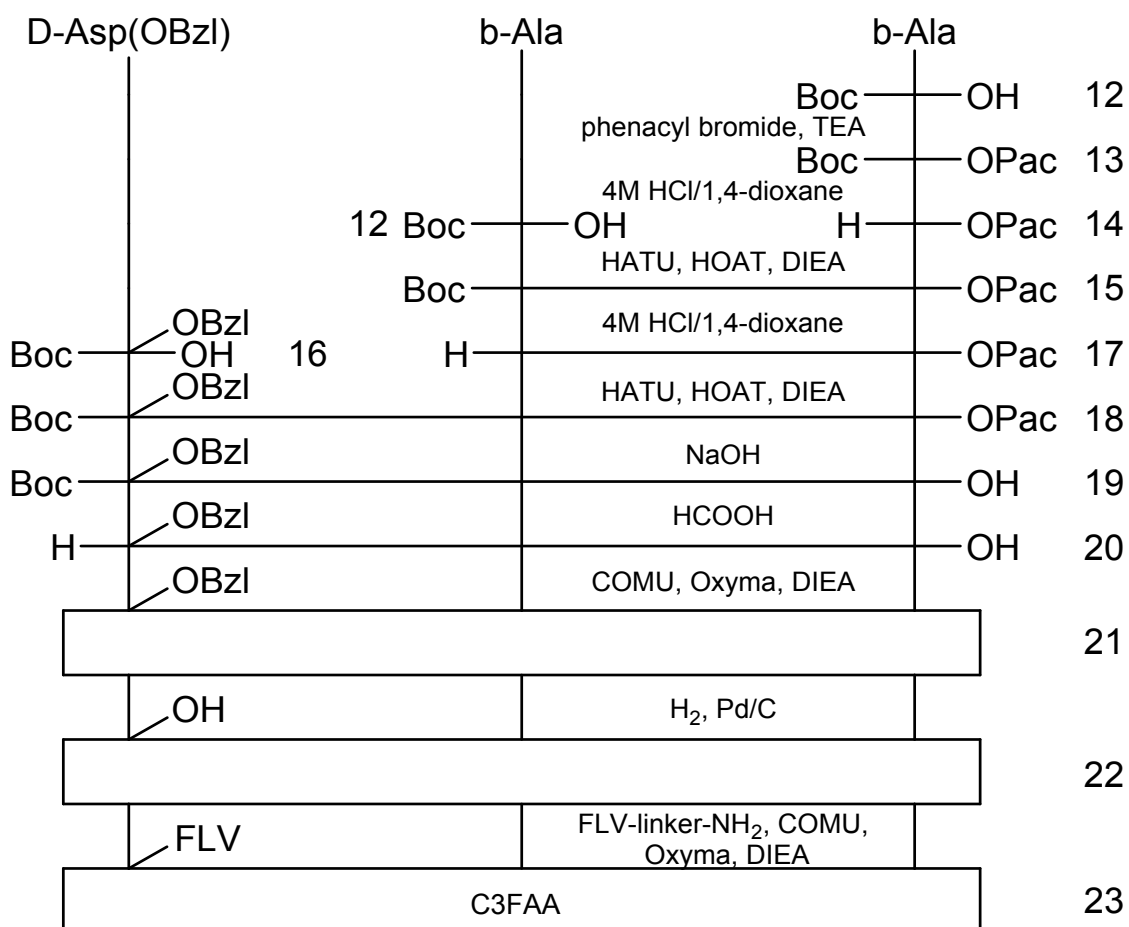

**Scheme 2.** Synthetic schemes for C3FAA

#### Boc-β-Ala-OPac (13)

Boc-β-Ala-OH (12) (5.095 g, 26.9 mmol) and 2-bromoacetophenone (7.891 g, 39.6 mmol) were dissolved in dry DMF. Then, TEA (5.52 mL, 39.6 mmol) was dropwised to the mixture at 0°C and stirred at room temperature for 20 h under Ar atmosphere. The solvent was removed under reduced pressure. The residue was taken up with CHCl<sub>3</sub> and washed with saturated NaHCO<sub>3</sub> aq. three times, 4 wt% KHSO<sub>4</sub> aq. three times and brine. The organic layer was dried over Na<sub>2</sub>SO<sub>4</sub> and the solvent was removed under reduced pressure. The residue was washed with hexane and diisopropyl ether to afford Boc-β-Ala-OPac (**33**) (6.361g, 20.7 mmol, 77 %).

<sup>1</sup>H-NMR (400 MHz, CDCl<sub>3</sub>):δ (ppm) 1.45 (s, 9H, Boc), 2.68–2.71 (t, 2H, AlaC<sup>α</sup>H<sub>2</sub>), 3.49–3.53 (q, 2H, AlaC<sup>β</sup>H<sub>2</sub>), 5.36 (s, 1H, AlaNH), 5.39 (s, 2H, OCH<sub>2</sub>COPh), 7.48–7.52, 7.61–7.64, 7.91–7.93 (m, 5H, aromatic).

#### Boc-(β-Ala)<sub>2</sub>-OPac (15)

Boc- $\beta$ -Ala-OPac (13) (3.013 g, 9.8mmol) was dissolved in 1,4-dioxane (10 mL). To the solution, 4 M HCl in 1,4-dioxane (90 mL) was dropwised and stirred at room temperature for 2 h. The solvent was removed under reduced pressure. The residue was washed with diisopropyl ether to afford H- $\beta$ -Ala-OPac (14). This deprotected product and Boc- $\beta$ -Ala-OH (12) (2.098 g, 11.1 mmol), HATU (5.278 g, 13.9 mmol), and HOAt (1.883 g, 13.8 mmol) were dissolved in dry DMF (20 mL) and then, DIEA (9.62 mL, 55.2 mmol) was added to the mixture at 0°C and thereafter stirred at room temperature for 20 h under Ar atmosphere. The solvent was removed under reduced pressure. The residue was taken up with CHCl<sub>3</sub> and washed with saturated NaHCO<sub>3</sub> aq. three times, 4 wt% KHSO<sub>4</sub> aq. three times and brine. The organic layer was dried over Na<sub>2</sub>SO<sub>4</sub> and the solvent was removed under reduced pressure. The residue was washed with diisopropyl ether to afford Boc-( $\beta$ -Ala)<sub>2</sub>-OMe (15) (2.447 g, 6.5 mmol, 70 %).

<sup>1</sup>H-NMR (400 MHz, CDCl<sub>3</sub>): $\delta$  (ppm) 1.40 (s, 9H, Boc), 2.45–2.48, 2.67–2.70 (t, 4H, AlaC <sup>$\alpha$</sup> H<sub>2</sub>), 3.40–3.45, 3.64–3.68 (q, 4H, AlaC <sup>$\beta$</sup> H<sub>2</sub>), 5.27 (s, 1H, AlaNH), 5.44 (s, 2H, OCH<sub>2</sub>COPh), 6.94 (s, 1H, AlaNH), 7.49–7.53, 7.62–7.66, 7.91–7.94 (m, 5H, aromatic).

#### **Boc-D-Asp(OBzl)- ( $\beta$ -Ala)<sub>2</sub>-OPac (18)**

Boc-( $\beta$ -Ala)<sub>2</sub>-OPac (15) (2.447 g, 6.5 mmol) was dissolved in 1,4-dioxane (14 mL). To the solution, 4 M HCl in 1,4-dioxane (130 mL) was dropwised and stirred at room temperature for 1 h. The solvent was removed under reduced pressure. The residue was washed with diisopropyl ether to afford H-( $\beta$ -Ala)<sub>2</sub>-OPac (17). Then, obtained deprotected product, Boc-D-Asp(OBzl)-OH (16) (2.445 g, 7.6 mmol), HATU (4.074 g, 10.7 mmol), and HOAt (1.471 g, 10.8 mmol) were dissolved in dry DMF (25 mL) and then, DIEA (2.4 mL, 13.9 mmol) was added to the mixture at 0°C and thereafter stirred at room temperature for 20 h under Ar atmosphere. The solvent was removed under reduced pressure. The residue was taken up with CHCl<sub>3</sub> and washed with sat. NaHCO<sub>3</sub> aq. three times, 4 wt% KHSO<sub>4</sub> aq. three times and brine. The organic layer was dried over Na<sub>2</sub>SO<sub>4</sub> and the solvent was removed under reduced pressure. The residue was washed with diisopropyl ether to afford Boc- $\beta$ -Asp(OBzl) - ( $\beta$ -Ala)<sub>2</sub>-OMe (18) (2.998 g, 5.1 mmol, 82 %).

<sup>1</sup>H-NMR (400 MHz, CDCl<sub>3</sub>): $\delta$  (ppm) 1.41 (s, 9H, Boc), 2.39–2.43, 2.69–2.72 (t, 4H, AlaC <sup>$\alpha$</sup> H<sub>2</sub>), 2.60–2.65, 2.81–2.86 (m, 2H, D-AspC <sup>$\alpha$</sup> H<sub>2</sub>), 3.50–3.52, 3.64–3.66 (m, 4H, AlaC <sup>$\beta$</sup> H<sub>2</sub>), 4.53–4.56 (t, 1H, D-AspC <sup>$\beta$</sup> H), 5.14 (s, 2H, COOCH<sub>2</sub>Ph), 5.44 (s, 2H, COOCH<sub>2</sub>COPh), 5.81–5.83 (d, 1H, D-AspNH), 6.56, 6.95 (br, 2H, AlaNH), 7.33 (m, 5H, COOCH<sub>2</sub>Ph), 7.49–7.53, 7.63–7.67, 7.90–7.93 (m, 5H, COOCH<sub>2</sub>COPh).

### CP3OBzl (21)

Boc-D-Asp(OBzl)-( $\beta$ -Ala)<sub>2</sub>-OPac (18) (2.950 g, 5.05 mmol) was dissolved in DMF (10 mL). To the solution, zinc powder (3 g) was added and 90 % DMF solution of AcOH (30 mL) was dropwised and stirred at 0°C overnight under Ar atmosphere. Zinc powder was removed by filtration and the solution was evaporated. The residue was taken up with CHCl<sub>3</sub> and washed with 4 % KHSO<sub>4</sub> aq. four times. The organic layer was dried over Na<sub>2</sub>SO<sub>4</sub> and the solvent was removed under reduced pressure to afford Boc-D-Asp(OBzl)-( $\beta$ -Ala)<sub>2</sub>-OH (19). Then, this deprotected product (927 mg, 1.99 mmol) was dissolved in TFA/anisole (11 mL, 10/1 = v/v) and stirred at room temperature for 2 h. The solvent was removed under reduced pressure. To the residue, 1 M HCl in diethyl ether was added and washed with diisopropyl ether to afford H-D-Asp(OBzl)-( $\beta$ -Ala)<sub>2</sub>-OH (20). Obtained deprotected product was separated into three round bottom flasks and COMU (2.901 g, 6.77 mmol), Oxyma (1.508 g, 10.61 mmol) were added to the each flasks, and thereafter dissolved in dry DMF (500 mL). To the solution was added 100 mL DMF solution of DIEA (2.08 mL, 11.92 mmol) at 0°C under Ar atmosphere and thereafter stirred at room temperature for 72 h under Ar atmosphere. The solvent was removed under reduced pressure. The precipitate was washed with MeCN and EtOH to afford CP3OBzl (21) (193 mg, 0.108 mmol, 28 %).

<sup>1</sup>H-NMR (400 MHz, DMSO-*d*<sub>6</sub>): $\delta$  (ppm) 2.11–2.50 (m, 6H, AlaC <sup>$\alpha$</sup> H<sub>2</sub>, D-AspC <sup>$\alpha$</sup> H<sub>2</sub>), 2.99–2.05, 3.21–3.23, 3.37–3.43 (m, 4H, AlaC <sup>$\beta$</sup> H<sub>2</sub>), 4.47–4.52 (m, 1H, D-AspC <sup>$\beta$</sup> H), 5.13 (s, 2H, COOCH<sub>2</sub>Ph), 7.32–7.40 (m, 5H, COOCH<sub>2</sub>Ph), 7.62–7.67, 7.94–7.96 (m, d, 3H, AlaNH, D-AspNH).

ESI-MS *m/z* : [M+Na]<sup>+</sup> calcd. for C<sub>17</sub>H<sub>21</sub>N<sub>3</sub>O<sub>5</sub>, 370.1373 ; found, 370.1378.

### C3FAA (23)

CP3OBzl (21) (115 mg, 0.33 mmol) was dissolved in HCOOH (10 mL) and 10 % Pd/C (100 mg) was added. The mixture was stirred for 20 h under H<sub>2</sub> atmosphere. The reaction mixture was then filtered and the filtrate was evaporated. The residue was washed with diisopropyl ether to obtain deprotected product. A part of this deprotected product (15 mg, 0.058 mmol), FLV-linker-NH<sub>3</sub>Cl (11) (15 mg, 0.045 mmol), COMU (48 mg, 0.112 mmol), and Oxyma (14 mg, 0.099 mmol) were dissolved in dry DMF (10 mL) and stirred under Ar atmosphere. Then, DIEA (62  $\mu$ L, 0.357 mmol) was dropwised to the solution at 0°C and stirred at room temperature for 20 h under Ar atmosphere. The solvent was removed under reduced pressure and the residue was washed with MeCN, MeOH and DMF in this order to obtain C3FAA (23) (8 mg, 15  $\mu$ mol, yield 33 %).

<sup>1</sup>H-NMR (400 MHz, TFA-*d*): $\delta$  (ppm) 2.58, 2.71 (s, 6H, aromatic CH<sub>3</sub>), 2.75, 2.85–2.88, 3.01–3.04, (m, 6H, AlaC <sup>$\alpha$</sup> H<sub>2</sub>, D-AspC <sup>$\alpha$</sup> H<sub>2</sub>), 3.38–3.41, 3.59–3.62, 3.74, 3.91, 4.44 (m, 8H, NCH<sub>2</sub>CH<sub>2</sub>NH, AlaC <sup>$\beta$</sup> H<sub>2</sub>), 4.44 (s, 3H, NCH<sub>3</sub>), 5.10–5.12 (d, 1H, D-AspC <sup>$\beta$</sup> H), 8.05, 8.21 (s, 2H, aromatic).

ESI-MS *m/z* : [M+Na]<sup>+</sup> calcd. for C<sub>25</sub>H<sub>30</sub>N<sub>8</sub>O<sub>6</sub>, 561.2181 ; found, 561.2177.

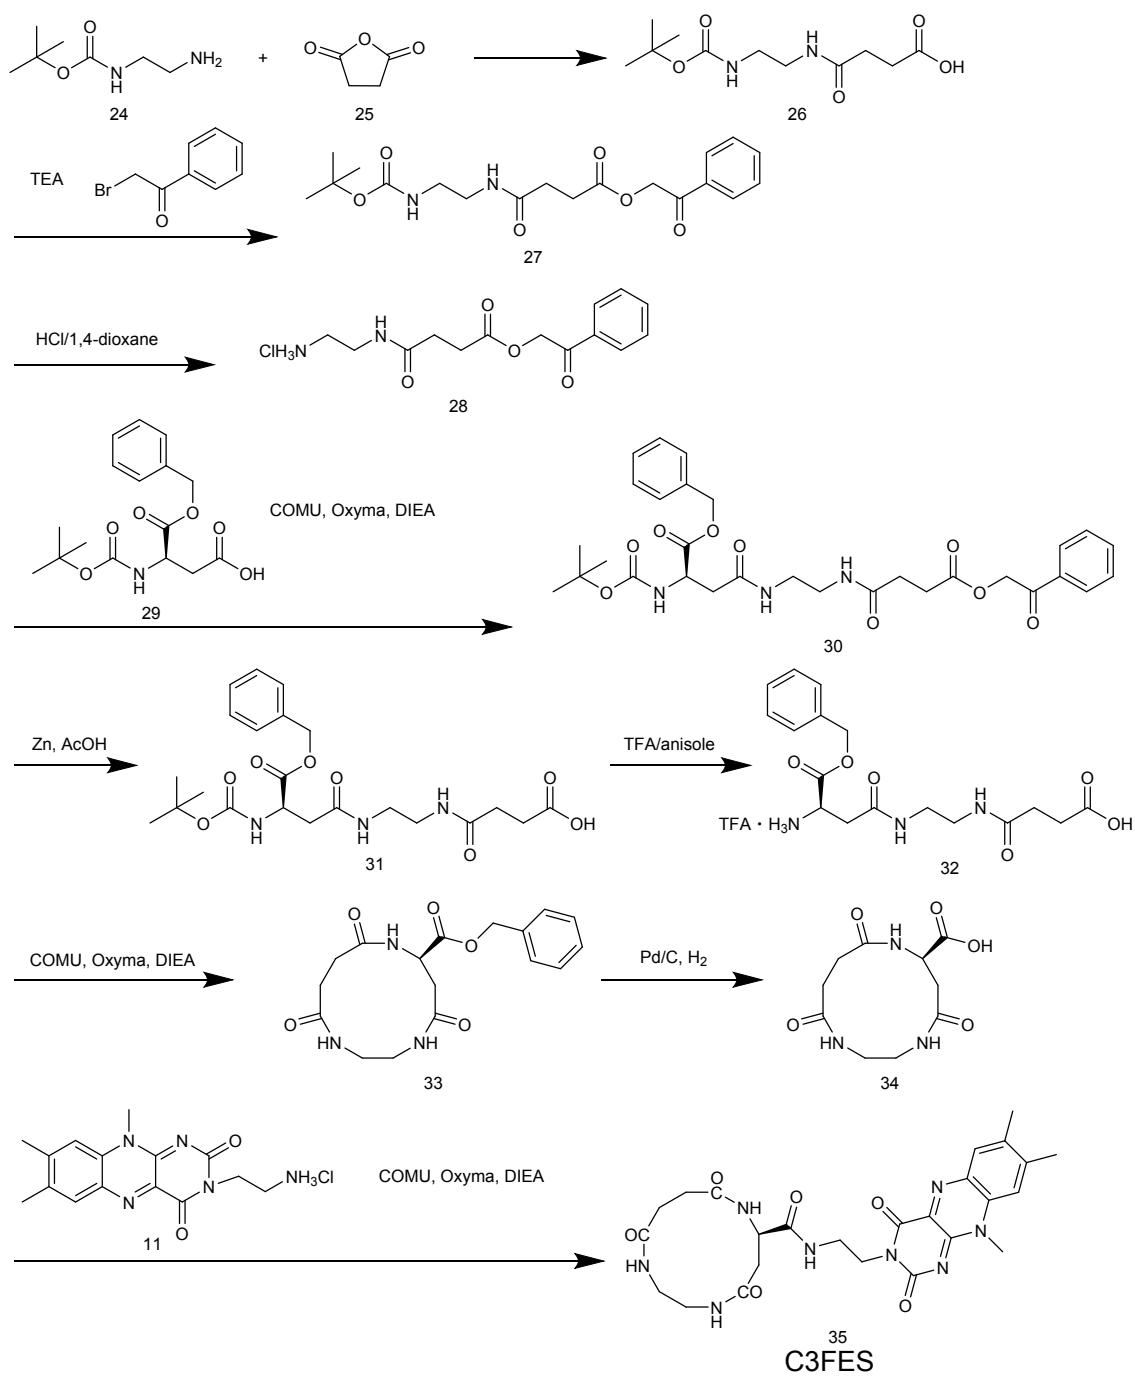

**Scheme 3.** Synthetic schemes for C3FES



### **Boc-EDA-SA-OPac (27)**

Succinic anhydride (25) (2.617g, 25.98 mmol) was dissolved in CH<sub>2</sub>Cl<sub>2</sub>. To this solution, Boc-ethylenediamine (24) (5 g, 31 mmol) in CH<sub>2</sub>Cl<sub>2</sub> was added and the solution was stirred at room temperature for 18 h under Ar atmosphere. The solution was evaporated to afford Boc-EDA-SA-OH (26) and used in the next step without further purification. This product and phenacyl bromide (7.803g, 39.20 mmol) was dissolved in dry DMF (100 mL) and then, TEA (5.43 mL, 38.96 mmol) was dropwised to the mixture at 0°C and stirred at room temperature for 20 h under Ar atmosphere. The solvent was removed under reduced pressure. The residue was dissolved in CHCl<sub>3</sub> and washed with 4% KHSO<sub>4</sub> aq. three times, sat. NaHCO<sub>3</sub> aq. three times and brine. The organic layer was dried over Na<sub>2</sub>SO<sub>4</sub> and the solvent was removed under reduced pressure. The residue was purified by column chromatography (silica gel, eluent: CHCl<sub>3</sub>/MeOH = 20/1 v/v) and to afford Boc-EDA-SA-OPac (27) (7.629 g, 20.16 mmol, 78 %).

<sup>1</sup>H-NMR (400 MHz, CDCl<sub>3</sub>):δ (ppm) 1.41 (s, 9H, Boc), 2.56–2.59 (t, 2H, CH<sub>2</sub>CH<sub>2</sub>COOPac), 2.84–2.87 (t, 2H, CH<sub>2</sub>CH<sub>2</sub>COOPac), 3.26–3.27 (m, 2H, BocNHCH<sub>2</sub>CH<sub>2</sub>), 3.36–3.40 (m, 2H, BocNHCH<sub>2</sub>CH<sub>2</sub>), 5.03, 6.38 (br, 2H, amide), 5.38 (s, 2H, OPac CH<sub>2</sub>), 7.48–7.51, 7.60–7.64, 7.90–7.92 (m, 5H, OPac aromatic).

ESI-MS *m/z* : [M+Na]<sup>+</sup> calcd. for C<sub>19</sub>H<sub>26</sub>N<sub>2</sub>O<sub>6</sub>, 401.1683 ; found, 401.1687.

### **Boc-D-Asp(OBzl)-EDA-SA-OPac (30)**

Boc-EDA-SA-OPac (27) (7.629 g, 20.27 mmol) was dissolved in 1,4-dioxane (8 mL). To the solution, 4 M HCl in 1,4-dioxane (100 mL) was dropwised and stirred at room temperature for 1 h. The solvent was removed under reduced pressure. The residue was washed with diethyl ether to afford H-EDA-SA-OPac (28). Then, obtained deprotected product, Boc-D-Asp(OBzl)-OH (29) (5.411 g, 16.75 mmol), HATU (10.104 g, 26.59 mmol), and HOAt (3.902 g, 28.69 mmol) were dissolved in dry DMF (120 mL) and then, DIEA (6.4 mL, 36.74 mmol) was added to the mixture at 0°C and thereafter stirred at room temperature for 20 h under Ar atmosphere. The solvent was removed under reduced pressure. The residue was taken up with CHCl<sub>3</sub> and washed with saturated NaHCO<sub>3</sub> aq. three times, 4 wt% KHSO<sub>4</sub> aq. three times and brine. The organic layer was dried over Na<sub>2</sub>SO<sub>4</sub> and the solvent was removed under reduced pressure. The residue was purified by column chromatography (silica gel, eluent: CHCl<sub>3</sub>/MeOH = 20/1 v/v) to afford Boc-D-Asp(OBzl)-EDA-SA-OMe (30) (6.624 g, 11.36 mmol, 68 %).

<sup>1</sup>H-NMR (400 MHz, CDCl<sub>3</sub>):δ (ppm) 1.41 (s, 9H, Boc), 2.53–2.88 (m, 6H, CHCH<sub>2</sub>, COCH<sub>2</sub>CH<sub>2</sub>CO), 3.34 (br, 4H, NHCH<sub>2</sub>CH<sub>2</sub>NH), 4.53–4.55 (t, 1H, CHCH<sub>2</sub>), 5.13 (s, 2H, COOCH<sub>2</sub>Ph), 5.37 (s, 2H, COOCH<sub>2</sub>COPh), 5.79–5.81 (d, 1H, urethane), 6.51 (br, 2H, amide), 7.32 (m, 5H, COOCH<sub>2</sub>Ph), 7.46–7.50, 7.60–7.64, 7.88–7.90 (m, 5H, COOCH<sub>2</sub>COPh).

ESI-MS *m/z* : [M+Na]<sup>+</sup> calcd. for C<sub>30</sub>H<sub>37</sub>N<sub>3</sub>O<sub>9</sub>, 606.2422 ; found, 606.2421.

### CP3ESOBzl (33)

Boc-D-Asp(OBzl)-EDA-SA-OPac (30) (6.624 g, 11.35 mmol) was dissolved in DMF (10 mL). To the solution, zinc powder (6 g) and 90 % aqueous solution of AcOH (60 mL) were added and stirred at 0°C overnight under Ar atmosphere. Zinc powder was removed by filtration and the solution was evaporated. The residue was taken up with CHCl<sub>3</sub> and washed with 4 % KHSO<sub>4</sub> aq. The organic layer was dried over Na<sub>2</sub>SO<sub>4</sub> and the solvent was removed under reduced pressure to afford Boc-D-Asp(OBzl)-EDA-SA-OH (31). Then, this deprotected product (4.180 g, 8.99 mmol) was dissolved in TFA/anisole (22 mL, 10/1 = v/v) and stirred at room temperature for 2 h. The solvent was removed under reduced pressure. The residue was washed with 1 M HCl in diethyl ether to afford H-D-Asp(OBzl)-(β-Ala)<sub>2</sub>-OH (32). Obtained deprotected product was separated into five round bottom flasks and dissolved in dry DMF (700 mL). COMU (7.59 g, 17.72 mmol) and Oxyma (3.78 g, 26.58 mmol) were added to each solutions. To the solution was added 50 mL DMF solution of DIEA (5.56 mL, 31.89 mmol) at 0°C under Ar atmosphere and thereafter stirred at room temperature for 72 h under Ar atmosphere. The solvent was removed under reduced pressure. The precipitate was washed with MeCN to afford CP3ESOBzl (33) (281 mg, 0.81 mmol, 7%).

<sup>1</sup>H-NMR (400 MHz, DMSO-*d*<sub>6</sub>):δ (ppm) 2.11–2.14 (m, 4H, COCH<sub>2</sub>CH<sub>2</sub>CO), 2.47 (m, 2H, D-AspC<sup>α</sup>H<sub>2</sub>), 2.78–2.81, 3.58–3.63 (m, 4H, NHCH<sub>2</sub>CH<sub>2</sub>NH), 4.71–4.77 (m, 1H, D-AspC<sup>β</sup>H), 5.13 (s, 2H, COOCH<sub>2</sub>Ph), 7.27–7.29, 7.49–7.51, 8.22 (d, d, s, 3H, NHCH<sub>2</sub>CH<sub>2</sub>NH, D-AspNH), 7.33–7.40 (m, 5H, COOCH<sub>2</sub>COPh), .

ESI-MS *m/z* : [M+Na]<sup>+</sup> calcd. for C<sub>17</sub>H<sub>21</sub>N<sub>3</sub>O<sub>5</sub>, 370.1373 ; found, 370.1377.

### C3FES (35)

CP3ESOBzl (33) (76 mg, 0.22 mmol) was dissolved in HCOOH (50 mL). 10% Pd/C (50 mg) was added to the solution and the solution was stirred under H<sub>2</sub> atmosphere at room temperature for 18 h. Pd/C was removed by filtration and the filtrate was evaporated to afford deprotected product (34). This deprotected product and FLV-linker-NH<sub>3</sub>Cl (11) (50 mg, 0.19 mmol) was dissolved in dry DMF (25 mL). To the solution was added COMU (171 mg, 0.40 mmol) and Oxyma (59 mg, 0.42 mmol), then, DIEA (102 μL, 0.58 mmol) were dropwised to the solution at 0°C. The solution was stirred at room temperature for 20 h under Ar atmosphere. The solvent was removed under reduced pressure and the residue was washed with MeCN, MeOH, DMF and diethyl ether in this order to afford CP3FES (35) (30 mg, 0.055 mmol, 28%).

<sup>1</sup>H-NMR (400 MHz, TFA-*d*):δ (ppm) 2.59, 2.72 (s, 6H, aromatic CH<sub>3</sub>), 2.62–2.66, 2.83–2.87, 2.98–3.01, (m, 6H, COCH<sub>2</sub>CH<sub>2</sub>CO, D-AspC<sup>α</sup>H<sub>2</sub>), 3.19–3.20, 3.70–3.75, 3.92–4.04, 4.45–4.48(m, 8H, NCH<sub>2</sub>CH<sub>2</sub>NH, AlaC<sup>β</sup>H<sub>2</sub>), 4.50 (s, 3H, NCH<sub>3</sub>), 5.24–5.26 (d, 1H, D-AspC<sup>β</sup>H), 8.07, 8.22 (s, 2H, aromatic).

ESI-MS  $m/z$  :  $[M+Na]^+$  calcd. for  $C_{25}H_{30}N_8O_6$ , 561.2181 ; found, 561.2180.

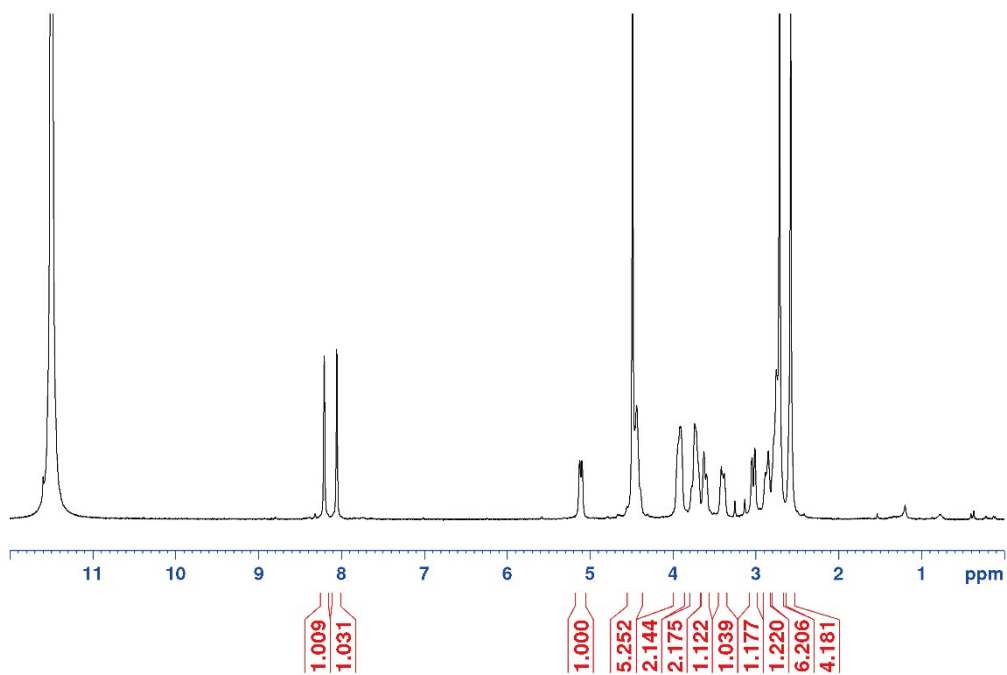

**Figure S1**  $^1\text{H-NMR}$  spectrum of C3FAA (23) in TFA-*d*.

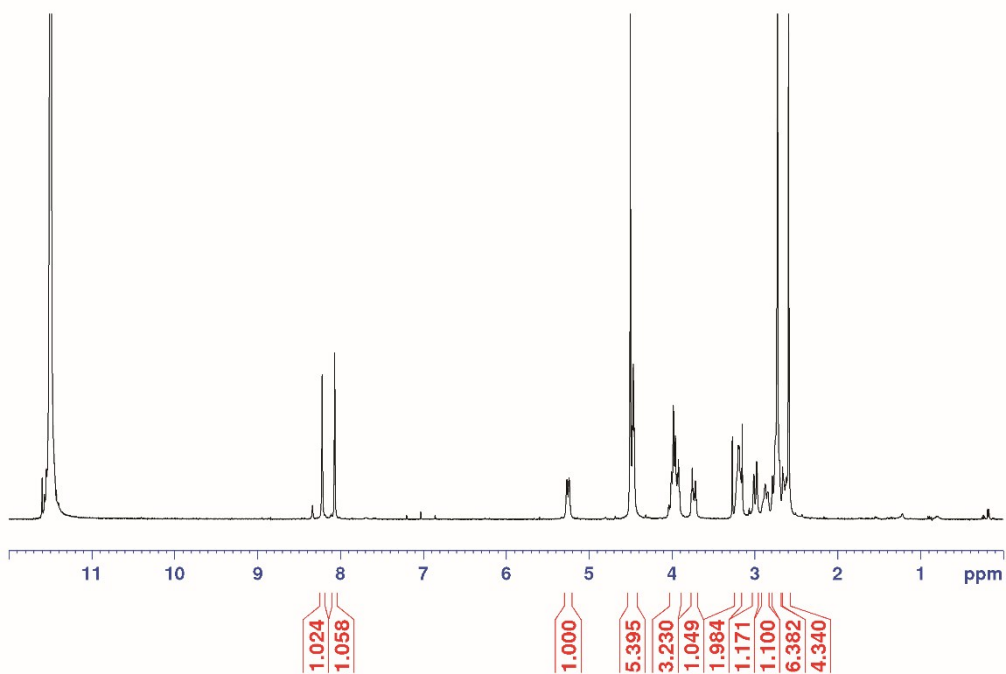

**Figure S2**  $^1\text{H-NMR}$  spectrum of C3FES (35) in TFA-*d*.

## 2. Supporting Figures section

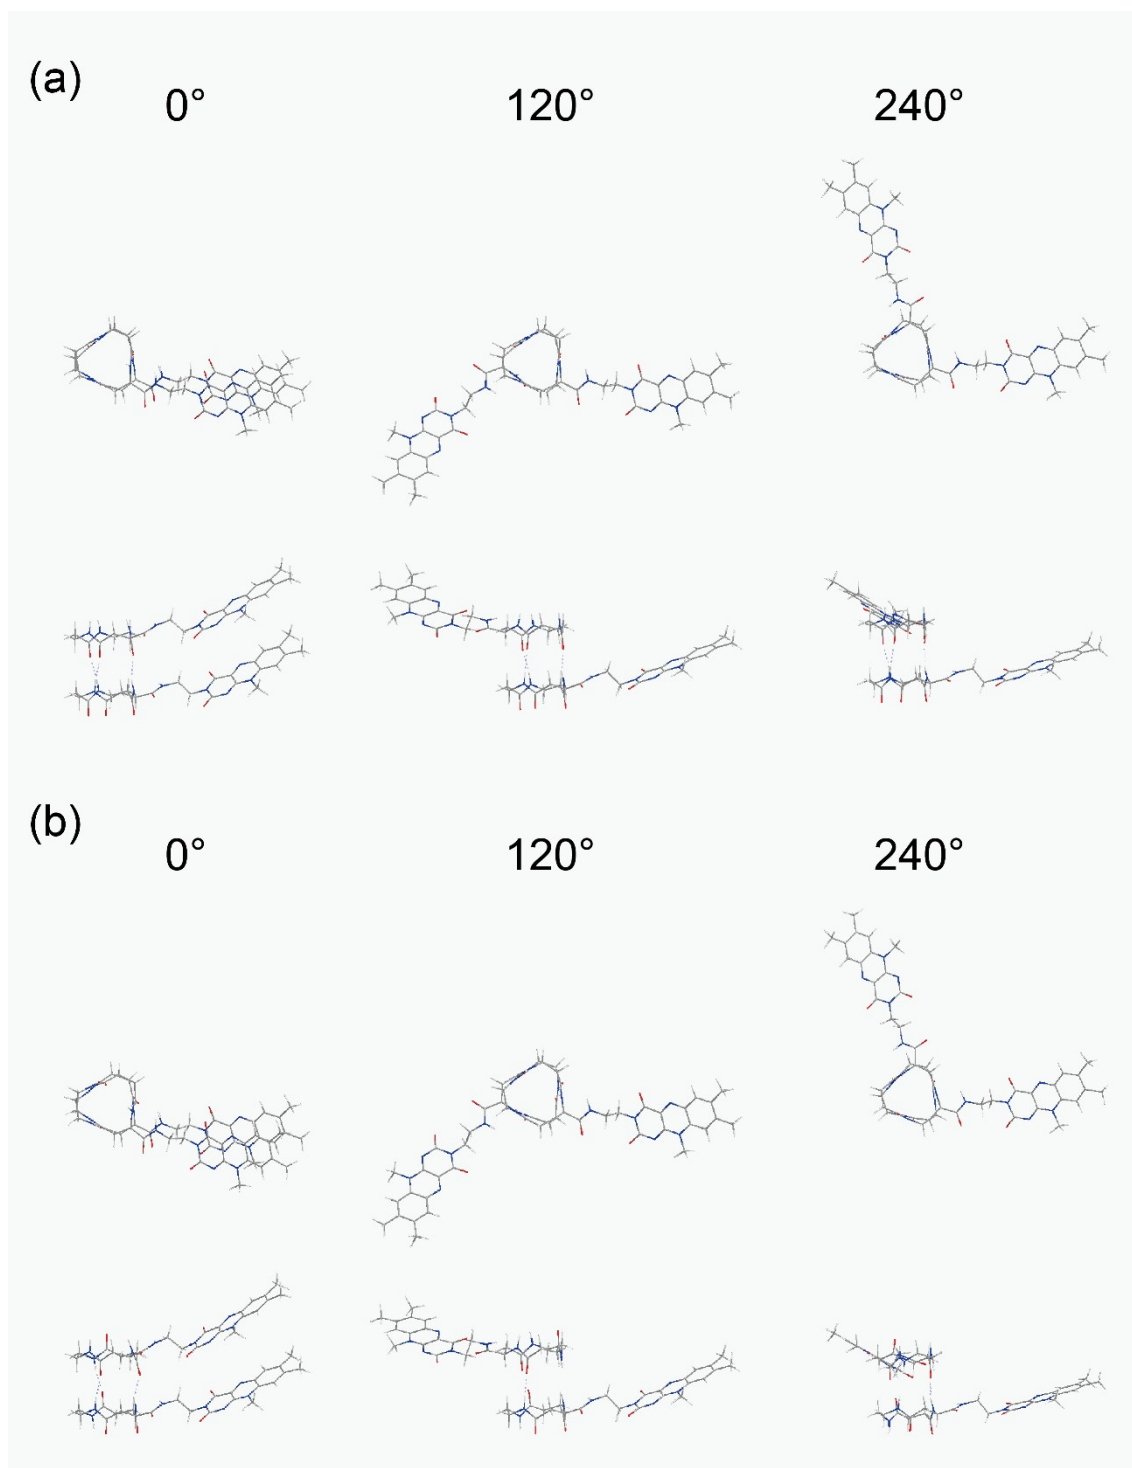

**Figure S3** (a) C3FAA and (b) C3FES optimized dimer structures with initial rotation of  $0^\circ$ ,  $120^\circ$ ,  $240^\circ$ .

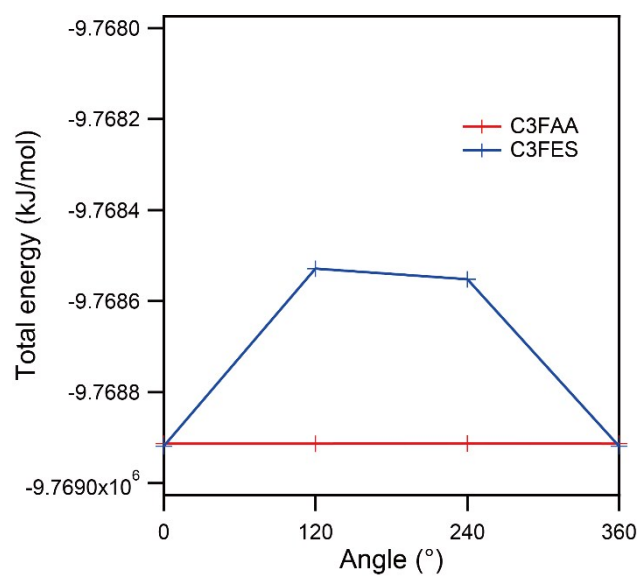

**Figure S4** The total energy of C3FAA (red) and C3FES (blue) dimers with initial rotation of 0°, 120°, 240°.

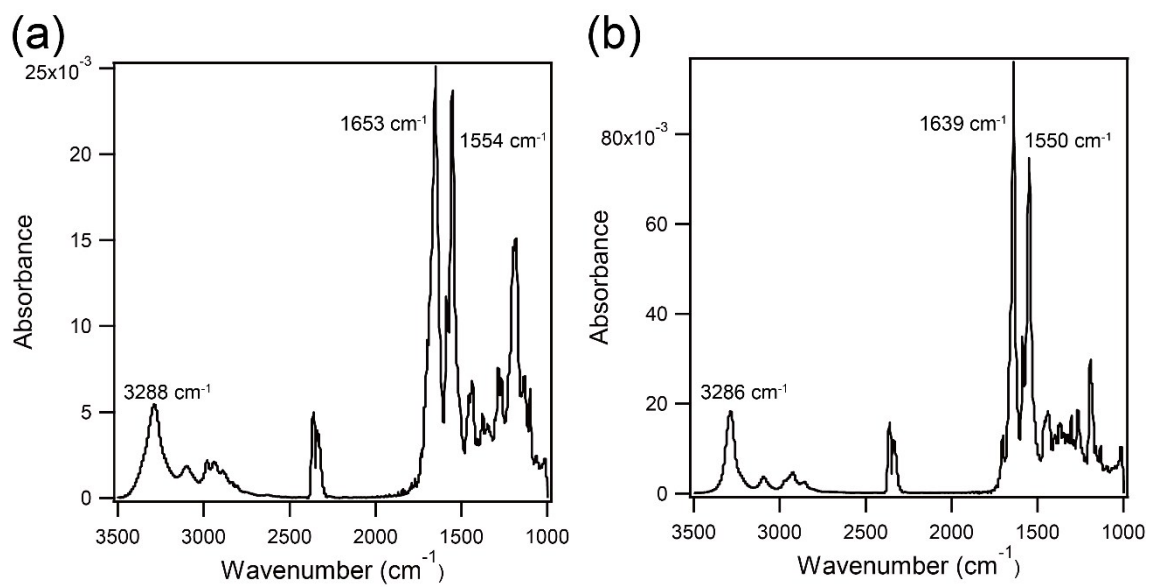

**Figure S5** ATR-FTIR spectra of the (a) C3FAA and (b) C3FES crystals.

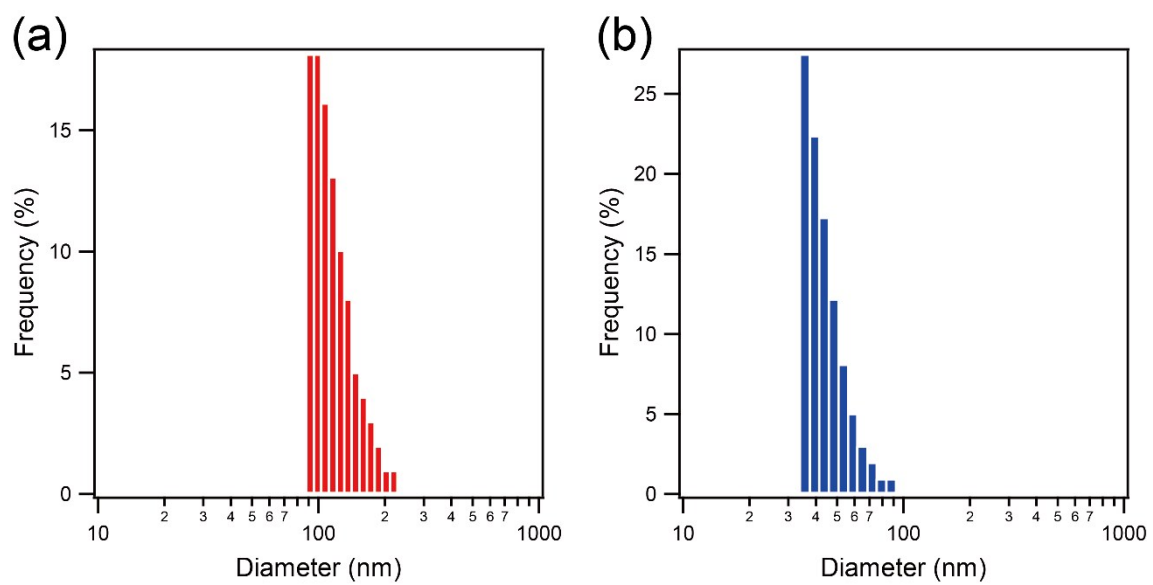

**Figure S6** DLS results of the peptide nanotubes of (a) C3FAA and (b)C3FES in mixed solution of HFIP and water (1/39 v/v).



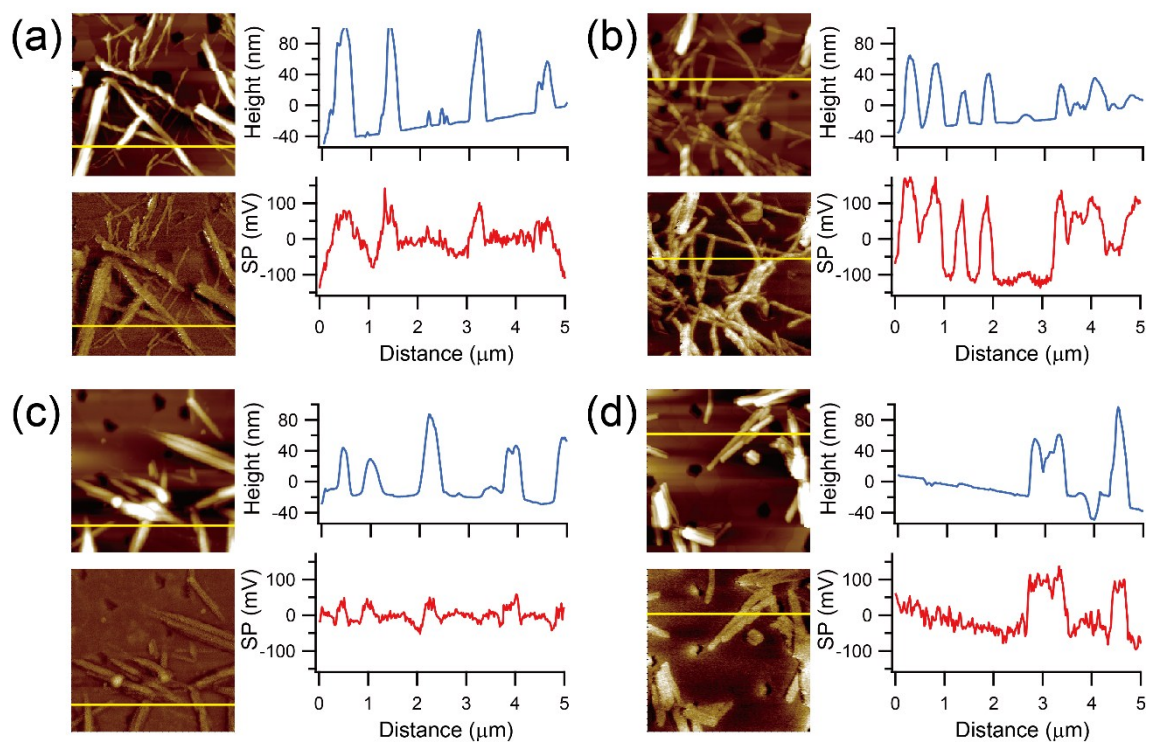

**Figure S7** AFM (upper) and KFM (lower) images and cross sectional profiles of C3FAA nanotube bundles (a) before and (c) after the thermal anneal treatments, and C3FES nanotube bundles (b) before and (d) after the thermal anneal treatments. The sizes of AFM images are  $5 \times 5 \mu\text{m}^2$ .

**Table S1.** The coordinates of the optimized geometry of C3FAA (0°)

| Center<br>Number | Atomic<br>Number | Atomic<br>Type | Coordinates (Angstroms) |           |           |
|------------------|------------------|----------------|-------------------------|-----------|-----------|
|                  |                  |                | X                       | Y         | Z         |
| 1                | 7                | 0              | -6.461844               | -3.556662 | 2.423746  |
| 2                | 6                | 0              | -8.227149               | -4.049922 | 0.807792  |
| 3                | 7                | 0              | -6.653841               | -3.912976 | -1.120457 |
| 4                | 6                | 0              | -4.424755               | -3.275224 | -1.889073 |
| 5                | 6                | 0              | -4.117553               | -2.783243 | 2.788314  |
| 6                | 6                | 0              | -5.581285               | -2.756702 | 3.268746  |
| 7                | 6                | 0              | -7.474094               | -3.053824 | 1.679274  |
| 8                | 8                | 0              | -7.776784               | -1.850033 | 1.675225  |
| 9                | 6                | 0              | -5.865494               | -2.907279 | -1.560166 |
| 10               | 8                | 0              | -6.258320               | -1.736610 | -1.686275 |
| 11               | 1                | 0              | -6.299435               | -4.554438 | 2.387805  |
| 12               | 1                | 0              | -9.292610               | -3.958633 | 1.043356  |
| 13               | 1                | 0              | -7.928586               | -5.080400 | 1.025368  |
| 14               | 1                | 0              | -6.250573               | -4.838885 | -1.064733 |
| 15               | 1                | 0              | -4.227751               | -2.978120 | -2.921818 |
| 16               | 1                | 0              | -4.248515               | -4.353007 | -1.810970 |
| 17               | 1                | 0              | -3.513820               | -2.221791 | 3.508779  |
| 18               | 1                | 0              | -3.743651               | -3.811885 | 2.779048  |
| 19               | 1                | 0              | -5.620967               | -3.137843 | 4.293589  |
| 20               | 1                | 0              | -5.966646               | -1.736873 | 3.268371  |
| 21               | 6                | 0              | -8.040782               | -3.752325 | -0.692128 |
| 22               | 1                | 0              | -8.334499               | -2.726825 | -0.916477 |
| 23               | 1                | 0              | -8.676438               | -4.428358 | -1.271768 |
| 24               | 8                | 0              | -4.108254               | -0.901460 | 1.281244  |
| 25               | 6                | 0              | -3.934524               | -2.117286 | 1.432332  |
| 26               | 7                | 0              | -3.562971               | -2.939854 | 0.410325  |
| 27               | 1                | 0              | -3.540965               | -3.935273 | 0.597504  |
| 28               | 6                | 0              | -3.445149               | -2.508191 | -0.977783 |
| 29               | 1                | 0              | -3.712394               | -1.447813 | -0.993977 |
| 30               | 6                | 0              | -2.009414               | -2.592671 | -1.542572 |
| 31               | 8                | 0              | -1.814316               | -2.386851 | -2.746078 |
| 32               | 7                | 0              | -1.028375               | -2.874865 | -0.659198 |

|    |   |   |           |           |           |
|----|---|---|-----------|-----------|-----------|
| 33 | 1 | 0 | -1.288037 | -3.005269 | 0.309583  |
| 34 | 6 | 0 | 0.381208  | -2.964633 | -1.014454 |
| 35 | 1 | 0 | 0.815451  | -3.821396 | -0.492240 |
| 36 | 1 | 0 | 0.449164  | -3.135996 | -2.089773 |
| 37 | 6 | 0 | 1.139239  | -1.680375 | -0.632231 |
| 38 | 1 | 0 | 0.775074  | -0.839215 | -1.219246 |
| 39 | 1 | 0 | 1.010166  | -1.471654 | 0.430373  |
| 40 | 6 | 0 | 3.369678  | -2.334434 | 0.128587  |
| 41 | 6 | 0 | 3.087409  | -1.410115 | -2.156866 |
| 42 | 6 | 0 | 4.821526  | -2.423342 | -0.188409 |
| 43 | 6 | 0 | 5.244727  | -1.976338 | -1.498969 |
| 44 | 6 | 0 | 6.954436  | -2.982302 | 0.433180  |
| 45 | 6 | 0 | 7.840683  | -3.494936 | 1.409869  |
| 46 | 6 | 0 | 7.470960  | -2.568385 | -0.827814 |
| 47 | 6 | 0 | 9.197693  | -3.608171 | 1.175941  |
| 48 | 1 | 0 | 7.410155  | -3.799716 | 2.358771  |
| 49 | 6 | 0 | 8.851483  | -2.681627 | -1.066437 |
| 50 | 6 | 0 | 9.709042  | -3.189523 | -0.094111 |
| 51 | 1 | 0 | 9.269088  | -2.373294 | -2.016150 |
| 52 | 7 | 0 | 2.582582  | -1.810863 | -0.883930 |
| 53 | 7 | 0 | 4.424594  | -1.502779 | -2.416820 |
| 54 | 7 | 0 | 6.587910  | -2.070005 | -1.772853 |
| 55 | 7 | 0 | 5.627893  | -2.899013 | 0.723287  |
| 56 | 8 | 0 | 2.288240  | -0.985686 | -2.995663 |
| 57 | 8 | 0 | 2.897075  | -2.695497 | 1.204919  |
| 58 | 6 | 0 | 10.119204 | -4.160360 | 2.234504  |
| 59 | 1 | 0 | 10.634964 | -5.061882 | 1.884243  |
| 60 | 1 | 0 | 10.894542 | -3.435479 | 2.507398  |
| 61 | 1 | 0 | 9.562726  | -4.418168 | 3.138348  |
| 62 | 6 | 0 | 11.182180 | -3.296023 | -0.388486 |
| 63 | 1 | 0 | 11.769055 | -2.705651 | 0.324778  |
| 64 | 1 | 0 | 11.527382 | -4.332462 | -0.298631 |
| 65 | 1 | 0 | 11.413203 | -2.944087 | -1.395865 |
| 66 | 6 | 0 | 7.096806  | -1.639789 | -3.086565 |
| 67 | 1 | 0 | 7.579143  | -2.483674 | -3.584050 |
| 68 | 1 | 0 | 6.255460  | -1.293570 | -3.677588 |

|     |   |   |            |           |           |
|-----|---|---|------------|-----------|-----------|
| 69  | 1 | 0 | 7.815281   | -0.828683 | -2.951497 |
| 70  | 7 | 0 | -8.008141  | 1.118011  | 1.834035  |
| 71  | 6 | 0 | -9.508946  | 0.681670  | -0.035256 |
| 72  | 7 | 0 | -7.626604  | 0.920670  | -1.657438 |
| 73  | 6 | 0 | -5.324775  | 1.655204  | -2.002960 |
| 74  | 6 | 0 | -5.788182  | 1.905823  | 2.661385  |
| 75  | 6 | 0 | -7.315780  | 1.878657  | 2.867755  |
| 76  | 6 | 0 | -8.940920  | 1.642797  | 1.003439  |
| 77  | 8 | 0 | -9.311575  | 2.827904  | 1.051274  |
| 78  | 6 | 0 | -6.814500  | 1.969905  | -1.918371 |
| 79  | 8 | 0 | -7.221243  | 3.133004  | -2.074582 |
| 80  | 1 | 0 | -7.814396  | 0.120888  | 1.767424  |
| 81  | 1 | 0 | -10.601119 | 0.753219  | 0.010129  |
| 82  | 1 | 0 | -9.228160  | -0.350174 | 0.194265  |
| 83  | 1 | 0 | -7.210419  | -0.005276 | -1.581365 |
| 84  | 1 | 0 | -4.966433  | 1.992671  | -2.978896 |
| 85  | 1 | 0 | -5.136230  | 0.580928  | -1.921275 |
| 86  | 1 | 0 | -5.341248  | 2.434229  | 3.510511  |
| 87  | 1 | 0 | -5.387831  | 0.888147  | 2.650389  |
| 88  | 1 | 0 | -7.526772  | 1.436637  | 3.847812  |
| 89  | 1 | 0 | -7.718461  | 2.892150  | 2.857780  |
| 90  | 6 | 0 | -9.068125  | 1.042514  | -1.468016 |
| 91  | 1 | 0 | -9.344828  | 2.070477  | -1.704576 |
| 92  | 1 | 0 | -9.581559  | 0.378585  | -2.171705 |
| 93  | 8 | 0 | -5.600964  | 3.873810  | 1.281299  |
| 94  | 6 | 0 | -5.396974  | 2.658518  | 1.397578  |
| 95  | 7 | 0 | -4.823198  | 1.906917  | 0.414241  |
| 96  | 1 | 0 | -4.718340  | 0.906838  | 0.576276  |
| 97  | 6 | 0 | -4.544287  | 2.427019  | -0.918603 |
| 98  | 1 | 0 | -4.888220  | 3.466099  | -0.922362 |
| 99  | 6 | 0 | -3.043967  | 2.491459  | -1.270532 |
| 100 | 8 | 0 | -2.692293  | 2.802010  | -2.416025 |
| 101 | 7 | 0 | -2.176751  | 2.226385  | -0.269209 |
| 102 | 1 | 0 | -2.564032  | 1.988484  | 0.634636  |
| 103 | 6 | 0 | -0.730951  | 2.292042  | -0.418657 |
| 104 | 1 | 0 | -0.287159  | 1.421157  | 0.070518  |

|     |   |   |           |          |           |
|-----|---|---|-----------|----------|-----------|
| 105 | 1 | 0 | -0.502847 | 2.251227 | -1.484931 |
| 106 | 6 | 0 | -0.158491 | 3.583658 | 0.193123  |
| 107 | 1 | 0 | -0.581436 | 4.454975 | -0.303425 |
| 108 | 1 | 0 | -0.378575 | 3.626197 | 1.260770  |
| 109 | 6 | 0 | 2.083003  | 3.013413 | 0.988074  |
| 110 | 6 | 0 | 1.834635  | 4.335681 | -1.096225 |
| 111 | 6 | 0 | 3.552077  | 3.119261 | 0.769731  |
| 112 | 6 | 0 | 3.999174  | 3.861283 | -0.390483 |
| 113 | 6 | 0 | 5.693686  | 2.641831 | 1.427739  |
| 114 | 6 | 0 | 6.573123  | 2.019531 | 2.344921  |
| 115 | 6 | 0 | 6.233973  | 3.358283 | 0.321924  |
| 116 | 6 | 0 | 7.945707  | 2.085959 | 2.200156  |
| 117 | 1 | 0 | 6.124938  | 1.482807 | 3.175379  |
| 118 | 6 | 0 | 7.630010  | 3.427092 | 0.173944  |
| 119 | 6 | 0 | 8.480787  | 2.808627 | 1.086296  |
| 120 | 1 | 0 | 8.065372  | 3.965409 | -0.657896 |
| 121 | 7 | 0 | 1.303468  | 3.648278 | 0.036041  |
| 122 | 7 | 0 | 3.186854  | 4.429657 | -1.259731 |
| 123 | 7 | 0 | 5.358061  | 3.959820 | -0.567990 |
| 124 | 7 | 0 | 4.351371  | 2.541368 | 1.627045  |
| 125 | 8 | 0 | 1.046004  | 4.835402 | -1.902822 |
| 126 | 8 | 0 | 1.590138  | 2.411014 | 1.940195  |
| 127 | 6 | 0 | 8.857949  | 1.411251 | 3.193896  |
| 128 | 1 | 0 | 9.487476  | 0.655888 | 2.709643  |
| 129 | 1 | 0 | 9.533120  | 2.130897 | 3.670839  |
| 130 | 1 | 0 | 8.280070  | 0.917667 | 3.978420  |
| 131 | 6 | 0 | 9.970900  | 2.907277 | 0.892567  |
| 132 | 1 | 0 | 10.449062 | 3.383735 | 1.756244  |
| 133 | 1 | 0 | 10.421453 | 1.913150 | 0.791681  |
| 134 | 1 | 0 | 10.218463 | 3.487504 | 0.001384  |
| 135 | 6 | 0 | 5.891661  | 4.710558 | -1.717800 |
| 136 | 1 | 0 | 6.474543  | 4.040284 | -2.353104 |
| 137 | 1 | 0 | 5.053446  | 5.112634 | -2.277051 |
| 138 | 1 | 0 | 6.524264  | 5.524467 | -1.358008 |

**Table S2.** The coordinates of the optimized geometry of C3FAA (120°)

| Center<br>Number | Atomic<br>Number | Atomic<br>Type | Coordinates (Angstroms) |           |          |
|------------------|------------------|----------------|-------------------------|-----------|----------|
|                  |                  |                | X                       | Y         | Z        |
| 1                | 7                | 0              | -1.196206               | -0.302080 | 2.817997 |
| 2                | 6                | 0              | -1.934490               | -2.329511 | 3.960980 |
| 3                | 7                | 0              | 0.371982                | -3.275189 | 3.949719 |
| 4                | 6                | 0              | 2.642029                | -3.060820 | 3.068675 |
| 5                | 6                | 0              | 0.598105                | 0.902793  | 1.574318 |
| 6                | 6                | 0              | -0.907269               | 0.607349  | 1.714065 |
| 7                | 6                | 0              | -1.766425               | -1.521477 | 2.681285 |
| 8                | 8                | 0              | -2.122294               | -1.983407 | 1.585038 |
| 9                | 6                | 0              | 1.203618                | -3.538331 | 2.917163 |
| 10               | 8                | 0              | 0.843110                | -4.124908 | 1.884698 |
| 11               | 1                | 0              | -0.968834               | 0.008829  | 3.753240 |
| 12               | 1                | 0              | -2.981559               | -2.644264 | 4.018909 |
| 13               | 1                | 0              | -1.722428               | -1.722962 | 4.847122 |
| 14               | 1                | 0              | 0.754508                | -2.798718 | 4.755784 |
| 15               | 1                | 0              | 3.297272                | -3.929460 | 2.967183 |
| 16               | 1                | 0              | 2.825642                | -2.616070 | 4.052199 |
| 17               | 1                | 0              | 0.726140                | 1.642725  | 0.777730 |
| 18               | 1                | 0              | 0.983512                | 1.344965  | 2.498473 |
| 19               | 1                | 0              | -1.438450               | 1.550740  | 1.873371 |
| 20               | 1                | 0              | -1.292314               | 0.147360  | 0.803882 |
| 21               | 6                | 0              | -1.053052               | -3.592839 | 3.963893 |
| 22               | 1                | 0              | -1.259912               | -4.203966 | 3.085296 |
| 23               | 1                | 0              | -1.279604               | -4.183619 | 4.856337 |
| 24               | 8                | 0              | 1.235956                | -0.864212 | 0.068084 |
| 25               | 6                | 0              | 1.390067                | -0.332836 | 1.174808 |
| 26               | 7                | 0              | 2.269115                | -0.808522 | 2.102058 |
| 27               | 1                | 0              | 2.270821                | -0.367699 | 3.014153 |
| 28               | 6                | 0              | 3.004344                | -2.059975 | 1.952779 |
| 29               | 1                | 0              | 2.696506                | -2.484097 | 0.992606 |
| 30               | 6                | 0              | 4.535967                | -1.883188 | 1.862225 |
| 31               | 8                | 0              | 5.267876                | -2.879829 | 1.881115 |
| 32               | 7                | 0              | 4.991579                | -0.618665 | 1.739097 |

|    |   |   |           |           |           |
|----|---|---|-----------|-----------|-----------|
| 33 | 1 | 0 | 4.310239  | 0.128290  | 1.714535  |
| 34 | 6 | 0 | 6.400149  | -0.277332 | 1.596818  |
| 35 | 1 | 0 | 6.596865  | 0.624421  | 2.182586  |
| 36 | 1 | 0 | 6.991239  | -1.098482 | 2.005022  |
| 37 | 6 | 0 | 6.776463  | -0.037737 | 0.122954  |
| 38 | 1 | 0 | 6.655960  | -0.955204 | -0.450743 |
| 39 | 1 | 0 | 6.150039  | 0.747157  | -0.302091 |
| 40 | 6 | 0 | 8.440618  | 1.753748  | 0.050349  |
| 41 | 6 | 0 | 9.182362  | -0.603621 | -0.166805 |
| 42 | 6 | 0 | 9.874362  | 2.121120  | -0.107604 |
| 43 | 6 | 0 | 10.822393 | 1.040996  | -0.282163 |
| 44 | 6 | 0 | 11.508585 | 3.722625  | -0.218157 |
| 45 | 6 | 0 | 11.875272 | 5.088908  | -0.186308 |
| 46 | 6 | 0 | 12.518491 | 2.733996  | -0.394656 |
| 47 | 6 | 0 | 13.189187 | 5.494675  | -0.319643 |
| 48 | 1 | 0 | 11.078084 | 5.813312  | -0.051193 |
| 49 | 6 | 0 | 13.855511 | 3.145651  | -0.530235 |
| 50 | 6 | 0 | 14.198615 | 4.494493  | -0.494348 |
| 51 | 1 | 0 | 14.642056 | 2.414542  | -0.664119 |
| 52 | 7 | 0 | 8.176158  | 0.395428  | -0.009926 |
| 53 | 7 | 0 | 10.489411 | -0.234920 | -0.307426 |
| 54 | 7 | 0 | 12.140802 | 1.400790  | -0.424588 |
| 55 | 7 | 0 | 10.197813 | 3.387084  | -0.076808 |
| 56 | 8 | 0 | 8.834608  | -1.787619 | -0.171765 |
| 57 | 8 | 0 | 7.552116  | 2.586726  | 0.220229  |
| 58 | 6 | 0 | 13.551507 | 6.958155  | -0.282410 |
| 59 | 1 | 0 | 14.253142 | 7.175881  | 0.530952  |
| 60 | 1 | 0 | 14.035534 | 7.273861  | -1.213867 |
| 61 | 1 | 0 | 12.662117 | 7.575427  | -0.137078 |
| 62 | 6 | 0 | 15.642818 | 4.895057  | -0.640536 |
| 63 | 1 | 0 | 15.782087 | 5.558058  | -1.502224 |
| 64 | 1 | 0 | 15.988718 | 5.447384  | 0.240968  |
| 65 | 1 | 0 | 16.286542 | 4.022952  | -0.771820 |
| 66 | 6 | 0 | 13.166108 | 0.359195  | -0.609576 |
| 67 | 1 | 0 | 13.882180 | 0.402082  | 0.213766  |
| 68 | 1 | 0 | 12.669799 | -0.605500 | -0.617518 |

|     |   |   |           |           |           |
|-----|---|---|-----------|-----------|-----------|
| 69  | 1 | 0 | 13.681457 | 0.520936  | -1.558482 |
| 70  | 7 | 0 | -0.493533 | -5.510250 | -0.409395 |
| 71  | 6 | 0 | 1.634134  | -4.966045 | -1.467770 |
| 72  | 7 | 0 | 0.740462  | -2.758374 | -2.221714 |
| 73  | 6 | 0 | -1.233612 | -1.356465 | -2.520734 |
| 74  | 6 | 0 | -2.914696 | -4.999878 | -0.085804 |
| 75  | 6 | 0 | -1.829182 | -6.078638 | -0.268315 |
| 76  | 6 | 0 | 0.295091  | -5.694611 | -1.495145 |
| 77  | 8 | 0 | -0.035354 | -6.389469 | -2.470825 |
| 78  | 6 | 0 | -0.311185 | -2.463032 | -3.019782 |
| 79  | 8 | 0 | -0.543715 | -3.041538 | -4.093618 |
| 80  | 1 | 0 | -0.117723 | -4.978360 | 0.372724  |
| 81  | 1 | 0 | 2.412541  | -5.693875 | -1.720953 |
| 82  | 1 | 0 | 1.847636  | -4.578287 | -0.467518 |
| 83  | 1 | 0 | 0.882062  | -2.199324 | -1.383777 |
| 84  | 1 | 0 | -1.277837 | -0.583215 | -3.292000 |
| 85  | 1 | 0 | -0.852545 | -0.899866 | -1.602497 |
| 86  | 1 | 0 | -3.869930 | -5.506764 | 0.088801  |
| 87  | 1 | 0 | -2.693864 | -4.385576 | 0.791586  |
| 88  | 1 | 0 | -1.851628 | -6.746576 | 0.599962  |
| 89  | 1 | 0 | -2.029763 | -6.673273 | -1.160117 |
| 90  | 6 | 0 | 1.696595  | -3.824026 | -2.502397 |
| 91  | 1 | 0 | 1.480972  | -4.203931 | -3.501663 |
| 92  | 1 | 0 | 2.709003  | -3.406659 | -2.505111 |
| 93  | 8 | 0 | -3.501831 | -4.606141 | -2.391676 |
| 94  | 6 | 0 | -3.077963 | -4.134408 | -1.328199 |
| 95  | 7 | 0 | -2.723409 | -2.825649 | -1.185834 |
| 96  | 1 | 0 | -2.355695 | -2.523586 | -0.283970 |
| 97  | 6 | 0 | -2.664898 | -1.891043 | -2.302109 |
| 98  | 1 | 0 | -2.962757 | -2.452335 | -3.193408 |
| 99  | 6 | 0 | -3.662853 | -0.719884 | -2.190888 |
| 100 | 8 | 0 | -3.602978 | 0.223831  | -2.989866 |
| 101 | 7 | 0 | -4.590303 | -0.805758 | -1.212438 |
| 102 | 1 | 0 | -4.573010 | -1.623307 | -0.617278 |
| 103 | 6 | 0 | -5.623721 | 0.197057  | -0.997782 |
| 104 | 1 | 0 | -5.818745 | 0.264419  | 0.075463  |



|     |   |   |            |           |           |
|-----|---|---|------------|-----------|-----------|
| 105 | 1 | 0 | -5.244103  | 1.158934  | -1.347674 |
| 106 | 6 | 0 | -6.921069  | -0.157452 | -1.747511 |
| 107 | 1 | 0 | -6.736014  | -0.190435 | -2.819849 |
| 108 | 1 | 0 | -7.299598  | -1.122377 | -1.409128 |
| 109 | 6 | 0 | -8.820230  | 0.643864  | -0.426685 |
| 110 | 6 | 0 | -8.061712  | 1.957432  | -2.389501 |
| 111 | 6 | 0 | -9.887149  | 1.670993  | -0.270013 |
| 112 | 6 | 0 | -9.909785  | 2.757076  | -1.226967 |
| 113 | 6 | 0 | -11.715057 | 2.475660  | 0.853135  |
| 114 | 6 | 0 | -12.646435 | 2.344702  | 1.910339  |
| 115 | 6 | 0 | -11.823269 | 3.581456  | -0.037606 |
| 116 | 6 | 0 | -13.662680 | 3.260375  | 2.105355  |
| 117 | 1 | 0 | -12.532134 | 1.488926  | 2.568318  |
| 118 | 6 | 0 | -12.855739 | 4.514313  | 0.160362  |
| 119 | 6 | 0 | -13.764361 | 4.368995  | 1.205285  |
| 120 | 1 | 0 | -12.960302 | 5.364798  | -0.500784 |
| 121 | 7 | 0 | -7.976294  | 0.839708  | -1.507337 |
| 122 | 7 | 0 | -9.046087  | 2.887173  | -2.214793 |
| 123 | 7 | 0 | -10.902415 | 3.693507  | -1.067186 |
| 124 | 7 | 0 | -10.738208 | 1.538895  | 0.713046  |
| 125 | 8 | 0 | -7.232780  | 2.050016  | -3.298784 |
| 126 | 8 | 0 | -8.694665  | -0.311387 | 0.337614  |
| 127 | 6 | 0 | -14.642571 | 3.094721  | 3.239670  |
| 128 | 1 | 0 | -14.621947 | 3.957588  | 3.915183  |
| 129 | 1 | 0 | -15.670409 | 3.004183  | 2.869927  |
| 130 | 1 | 0 | -14.413446 | 2.201122  | 3.824772  |
| 131 | 6 | 0 | -14.857402 | 5.390061  | 1.380795  |
| 132 | 1 | 0 | -15.846640 | 4.921989  | 1.318608  |
| 133 | 1 | 0 | -14.796075 | 5.867592  | 2.365567  |
| 134 | 1 | 0 | -14.798898 | 6.169187  | 0.618065  |
| 135 | 6 | 0 | -10.993103 | 4.827762  | -2.002617 |
| 136 | 1 | 0 | -10.887743 | 5.764058  | -1.450827 |
| 137 | 1 | 0 | -10.191155 | 4.733188  | -2.727198 |
| 138 | 1 | 0 | -11.958937 | 4.803643  | -2.511379 |

**Table S3.** The coordinates of the optimized geometry of C3FAA (240°)

| Center<br>Number | Atomic<br>Number | Atomic<br>Type | Coordinates (Angstroms) |           |          |
|------------------|------------------|----------------|-------------------------|-----------|----------|
|                  |                  |                | X                       | Y         | Z        |
| 1                | 7                | 0              | -0.600224               | -5.083294 | 3.621340 |
| 2                | 6                | 0              | 1.691277                | -4.326732 | 3.997502 |
| 3                | 7                | 0              | 1.123759                | -1.992235 | 3.334109 |
| 4                | 6                | 0              | -0.561330               | -0.538713 | 2.323771 |
| 5                | 6                | 0              | -2.870613               | -4.607814 | 2.710218 |
| 6                | 6                | 0              | -1.748310               | -5.642687 | 2.915256 |
| 7                | 6                | 0              | 0.648555                | -4.990512 | 3.107965 |
| 8                | 8                | 0              | 0.946422                | -5.396725 | 1.973286 |
| 9                | 6                | 0              | 0.590838                | -1.524844 | 2.183805 |
| 10               | 8                | 0              | 0.989801                | -1.868432 | 1.059761 |
| 11               | 1                | 0              | -0.747062               | -4.756152 | 4.567230 |
| 12               | 1                | 0              | 2.547251                | -5.005758 | 4.068254 |
| 13               | 1                | 0              | 1.311103                | -4.167582 | 5.011545 |
| 14               | 1                | 0              | 0.740906                | -1.651416 | 4.206074 |
| 15               | 1                | 0              | -0.274035               | 0.388796  | 1.822295 |
| 16               | 1                | 0              | -0.773325               | -0.300428 | 3.371341 |
| 17               | 1                | 0              | -3.722718               | -5.116129 | 2.247587 |
| 18               | 1                | 0              | -3.204382               | -4.219005 | 3.677329 |
| 19               | 1                | 0              | -2.147941               | -6.486922 | 3.485472 |
| 20               | 1                | 0              | -1.391288               | -6.016042 | 1.955209 |
| 21               | 6                | 0              | 2.184792                | -2.992814 | 3.405767 |
| 22               | 1                | 0              | 2.562132                | -3.141186 | 2.394000 |
| 23               | 1                | 0              | 2.999556                | -2.606833 | 4.025203 |
| 24               | 8                | 0              | -2.207443               | -3.700791 | 0.580754 |
| 25               | 6                | 0              | -2.450616               | -3.484686 | 1.774164 |
| 26               | 7                | 0              | -2.362315               | -2.242425 | 2.329883 |
| 27               | 1                | 0              | -2.489646               | -2.171534 | 3.332100 |
| 28               | 6                | 0              | -1.827548               | -1.079506 | 1.630271 |
| 29               | 1                | 0              | -1.553050               | -1.424494 | 0.629067 |
| 30               | 6                | 0              | -2.850796               | 0.054752  | 1.409931 |
| 31               | 8                | 0              | -2.466770               | 1.143462  | 0.966321 |
| 32               | 7                | 0              | -4.141017               | -0.225450 | 1.691747 |

|    |   |   |            |           |           |
|----|---|---|------------|-----------|-----------|
| 33 | 1 | 0 | -4.363751  | -1.153531 | 2.026715  |
| 34 | 6 | 0 | -5.231224  | 0.711229  | 1.452515  |
| 35 | 1 | 0 | -5.958507  | 0.610430  | 2.261715  |
| 36 | 1 | 0 | -4.818728  | 1.721196  | 1.472162  |
| 37 | 6 | 0 | -5.908010  | 0.444846  | 0.095620  |
| 38 | 1 | 0 | -5.185297  | 0.557247  | -0.710632 |
| 39 | 1 | 0 | -6.327616  | -0.561666 | 0.075879  |
| 40 | 6 | 0 | -8.263868  | 1.063738  | 0.324279  |
| 41 | 6 | 0 | -6.717548  | 2.587535  | -0.876993 |
| 42 | 6 | 0 | -9.334816  | 2.045211  | -0.002197 |
| 43 | 6 | 0 | -8.954058  | 3.214306  | -0.766603 |
| 44 | 6 | 0 | -11.530158 | 2.691993  | 0.103324  |
| 45 | 6 | 0 | -12.851603 | 2.439884  | 0.541959  |
| 46 | 6 | 0 | -11.259435 | 3.868272  | -0.652680 |
| 47 | 6 | 0 | -13.892286 | 3.302689  | 0.256339  |
| 48 | 1 | 0 | -13.019265 | 1.533625  | 1.115614  |
| 49 | 6 | 0 | -12.317417 | 4.746632  | -0.943987 |
| 50 | 6 | 0 | -13.612006 | 4.481744  | -0.505643 |
| 51 | 1 | 0 | -12.139507 | 5.647136  | -1.517563 |
| 52 | 7 | 0 | -7.007541  | 1.388545  | -0.159454 |
| 53 | 7 | 0 | -7.723001  | 3.463904  | -1.168139 |
| 54 | 7 | 0 | -9.959088  | 4.099868  | -1.072239 |
| 55 | 7 | 0 | -10.550028 | 1.800049  | 0.411486  |
| 56 | 8 | 0 | -5.551171  | 2.796315  | -1.221276 |
| 57 | 8 | 0 | -8.470751  | 0.037152  | 0.969046  |
| 58 | 6 | 0 | -15.291643 | 3.008266  | 0.735379  |
| 59 | 1 | 0 | -15.666368 | 3.804550  | 1.388802  |
| 60 | 1 | 0 | -15.992369 | 2.928493  | -0.103624 |
| 61 | 1 | 0 | -15.322275 | 2.069627  | 1.293229  |
| 62 | 6 | 0 | -14.718205 | 5.447135  | -0.840154 |
| 63 | 1 | 0 | -15.507915 | 4.954912  | -1.419645 |
| 64 | 1 | 0 | -15.190519 | 5.835196  | 0.069730  |
| 65 | 1 | 0 | -14.345099 | 6.293542  | -1.420197 |
| 66 | 6 | 0 | -9.652473  | 5.308717  | -1.856387 |
| 67 | 1 | 0 | -9.905220  | 6.196126  | -1.272616 |
| 68 | 1 | 0 | -8.591298  | 5.304533  | -2.081933 |

|     |   |   |            |           |           |
|-----|---|---|------------|-----------|-----------|
| 69  | 1 | 0 | -10.229847 | 5.297253  | -2.783033 |
| 70  | 7 | 0 | -1.100416  | -3.838856 | -2.221064 |
| 71  | 6 | 0 | -1.166285  | -6.230490 | -1.750808 |
| 72  | 7 | 0 | 1.173934   | -6.194537 | -0.890941 |
| 73  | 6 | 0 | 3.255510   | -4.940584 | -0.689680 |
| 74  | 6 | 0 | 0.272545   | -1.764722 | -2.445413 |
| 75  | 6 | 0 | -0.895479  | -2.613784 | -2.985841 |
| 76  | 6 | 0 | -0.978721  | -5.084561 | -2.738867 |
| 77  | 8 | 0 | -0.711374  | -5.306570 | -3.931331 |
| 78  | 6 | 0 | 2.343810   | -5.868297 | -1.485632 |
| 79  | 8 | 0 | 2.680775   | -6.270256 | -2.611631 |
| 80  | 1 | 0 | -1.381954  | -3.748480 | -1.248107 |
| 81  | 1 | 0 | -1.902487  | -6.920366 | -2.177610 |
| 82  | 1 | 0 | -1.560337  | -5.866137 | -0.797617 |
| 83  | 1 | 0 | 1.006474   | -5.862317 | 0.056594  |
| 84  | 1 | 0 | 4.227501   | -5.430206 | -0.589806 |
| 85  | 1 | 0 | 2.860777   | -4.754709 | 0.313581  |
| 86  | 1 | 0 | 0.308308   | -0.833758 | -3.021759 |
| 87  | 1 | 0 | 0.098806   | -1.503669 | -1.397696 |
| 88  | 1 | 0 | -1.808705  | -2.009687 | -2.955124 |
| 89  | 1 | 0 | -0.710243  | -2.898278 | -4.022361 |
| 90  | 6 | 0 | 0.142535   | -7.011468 | -1.520566 |
| 91  | 1 | 0 | 0.540942   | -7.371095 | -2.469850 |
| 92  | 1 | 0 | -0.070027  | -7.878813 | -0.886327 |
| 93  | 8 | 0 | 2.083853   | -2.691016 | -3.739811 |
| 94  | 6 | 0 | 1.616835   | -2.458945 | -2.616952 |
| 95  | 7 | 0 | 2.256189   | -2.803784 | -1.463002 |
| 96  | 1 | 0 | 1.790547   | -2.608579 | -0.577111 |
| 97  | 6 | 0 | 3.470420   | -3.609443 | -1.439925 |
| 98  | 1 | 0 | 3.709951   | -3.836780 | -2.483775 |
| 99  | 6 | 0 | 4.703397   | -2.866285 | -0.884250 |
| 100 | 8 | 0 | 5.746617   | -3.486965 | -0.641517 |
| 101 | 7 | 0 | 4.580370   | -1.531024 | -0.720468 |
| 102 | 1 | 0 | 3.695383   | -1.106803 | -0.964780 |
| 103 | 6 | 0 | 5.671182   | -0.676018 | -0.273653 |
| 104 | 1 | 0 | 5.244540   | 0.155512  | 0.292413  |

|     |   |   |           |           |           |
|-----|---|---|-----------|-----------|-----------|
| 105 | 1 | 0 | 6.315074  | -1.258298 | 0.388242  |
| 106 | 6 | 0 | 6.491159  | -0.140027 | -1.461808 |
| 107 | 1 | 0 | 6.944026  | -0.967331 | -2.005582 |
| 108 | 1 | 0 | 5.850550  | 0.434345  | -2.131503 |
| 109 | 6 | 0 | 7.295139  | 2.100562  | -0.893855 |
| 110 | 6 | 0 | 8.845533  | 0.172170  | -0.719318 |
| 111 | 6 | 0 | 8.447589  | 2.944557  | -0.473240 |
| 112 | 6 | 0 | 9.704588  | 2.273578  | -0.216099 |
| 113 | 6 | 0 | 9.319073  | 5.004807  | 0.021318  |
| 114 | 6 | 0 | 9.138968  | 6.402743  | 0.144176  |
| 115 | 6 | 0 | 10.596971 | 4.440434  | 0.297410  |
| 116 | 6 | 0 | 10.169526 | 7.240819  | 0.524671  |
| 117 | 1 | 0 | 8.151209  | 6.796502  | -0.074463 |
| 118 | 6 | 0 | 11.646066 | 5.291724  | 0.684827  |
| 119 | 6 | 0 | 11.451190 | 6.665544  | 0.800155  |
| 120 | 1 | 0 | 12.626957 | 4.887513  | 0.898516  |
| 121 | 7 | 0 | 7.575412  | 0.749787  | -1.016379 |
| 122 | 7 | 0 | 9.881717  | 0.971901  | -0.330475 |
| 123 | 7 | 0 | 10.755356 | 3.069299  | 0.171871  |
| 124 | 7 | 0 | 8.264674  | 4.233408  | -0.358699 |
| 125 | 8 | 0 | 8.971920  | -1.050456 | -0.827464 |
| 126 | 8 | 0 | 6.178149  | 2.561335  | -1.122655 |
| 127 | 6 | 0 | 9.947100  | 8.727607  | 0.646098  |
| 128 | 1 | 0 | 10.153343 | 9.081582  | 1.662715  |
| 129 | 1 | 0 | 10.607229 | 9.287216  | -0.026469 |
| 130 | 1 | 0 | 8.914875  | 8.987071  | 0.400376  |
| 131 | 6 | 0 | 12.601357 | 7.543548  | 1.217555  |
| 132 | 1 | 0 | 12.818197 | 8.298136  | 0.452648  |
| 133 | 1 | 0 | 12.366446 | 8.087658  | 2.139733  |
| 134 | 1 | 0 | 13.507179 | 6.957986  | 1.387226  |
| 135 | 6 | 0 | 12.065880 | 2.460171  | 0.457575  |
| 136 | 1 | 0 | 12.347497 | 2.670668  | 1.491406  |
| 137 | 1 | 0 | 11.979843 | 1.389046  | 0.308245  |
| 138 | 1 | 0 | 12.815164 | 2.871895  | -0.221739 |

**Table S4.** The coordinates of the optimized geometry of C3FES (0°)

| Center<br>Number | Atomic<br>Number | Atomic<br>Type | Coordinates (Angstroms) |          |           |
|------------------|------------------|----------------|-------------------------|----------|-----------|
|                  |                  |                | X                       | Y        | Z         |
| 1                | 6                | 0              | 8.240232                | 3.772399 | 1.165639  |
| 2                | 7                | 0              | 6.670191                | 3.917127 | -0.763091 |
| 3                | 6                | 0              | 4.414101                | 3.400040 | -1.536578 |
| 4                | 6                | 0              | 4.038530                | 2.022178 | 2.958624  |
| 5                | 6                | 0              | 5.547205                | 2.069952 | 3.279030  |
| 6                | 6                | 0              | 5.851362                | 2.971011 | -1.268397 |
| 7                | 8                | 0              | 6.217561                | 1.810351 | -1.518635 |
| 8                | 1                | 0              | 9.293427                | 3.576756 | 1.392269  |
| 9                | 1                | 0              | 8.000650                | 4.779041 | 1.514928  |
| 10               | 1                | 0              | 6.272318                | 4.823213 | -0.554502 |
| 11               | 1                | 0              | 4.225579                | 3.294637 | -2.608213 |
| 12               | 1                | 0              | 4.247095                | 4.449196 | -1.271272 |
| 13               | 1                | 0              | 3.565386                | 1.266484 | 3.590364  |
| 14               | 1                | 0              | 3.583880                | 2.990605 | 3.182810  |
| 15               | 1                | 0              | 5.661899                | 2.274230 | 4.349833  |
| 16               | 1                | 0              | 6.013754                | 1.103658 | 3.074805  |
| 17               | 6                | 0              | 8.049819                | 3.679443 | -0.358829 |
| 18               | 1                | 0              | 8.328658                | 2.690157 | -0.723952 |
| 19               | 1                | 0              | 8.702885                | 4.415955 | -0.839616 |
| 20               | 8                | 0              | 3.821117                | 0.445887 | 1.138717  |
| 21               | 6                | 0              | 3.785509                | 1.626315 | 1.513047  |
| 22               | 7                | 0              | 3.533481                | 2.656721 | 0.655659  |
| 23               | 1                | 0              | 3.635819                | 3.595834 | 1.024819  |
| 24               | 6                | 0              | 3.418770                | 2.492891 | -0.788844 |
| 25               | 1                | 0              | 3.669619                | 1.449912 | -1.002177 |
| 26               | 6                | 0              | 1.990389                | 2.700111 | -1.337483 |
| 27               | 8                | 0              | 1.795992                | 2.666716 | -2.558681 |
| 28               | 7                | 0              | 1.013823                | 2.891229 | -0.425782 |
| 29               | 1                | 0              | 1.275583                | 2.887126 | 0.551400  |
| 30               | 6                | 0              | -0.389979               | 3.065664 | -0.770622 |
| 31               | 1                | 0              | -0.810722               | 3.842425 | -0.126805 |
| 32               | 1                | 0              | -0.444602               | 3.399795 | -1.807953 |

|    |   |   |            |           |           |
|----|---|---|------------|-----------|-----------|
| 33 | 6 | 0 | -1.179215  | 1.755174  | -0.595353 |
| 34 | 1 | 0 | -0.806091  | 0.996775  | -1.281305 |
| 35 | 1 | 0 | -1.091342  | 1.397802  | 0.431161  |
| 36 | 6 | 0 | -3.423384  | 2.358697  | 0.167626  |
| 37 | 6 | 0 | -3.075504  | 1.726916  | -2.206306 |
| 38 | 6 | 0 | -4.860639  | 2.523968  | -0.184601 |
| 39 | 6 | 0 | -5.244601  | 2.253484  | -1.554180 |
| 40 | 6 | 0 | -7.002266  | 3.060280  | 0.427405  |
| 41 | 6 | 0 | -7.912281  | 3.476576  | 1.427755  |
| 42 | 6 | 0 | -7.481038  | 2.814397  | -0.890975 |
| 43 | 6 | 0 | -9.257029  | 3.652978  | 1.163304  |
| 44 | 1 | 0 | -7.510626  | 3.654443  | 2.420551  |
| 45 | 6 | 0 | -8.849108  | 2.990972  | -1.160619 |
| 46 | 6 | 0 | -9.730592  | 3.401471  | -0.164011 |
| 47 | 1 | 0 | -9.238393  | 2.809874  | -2.154059 |
| 48 | 7 | 0 | -2.610549  | 1.947724  | -0.875722 |
| 49 | 7 | 0 | -4.400954  | 1.879756  | -2.496325 |
| 50 | 7 | 0 | -6.575139  | 2.410335  | -1.859075 |
| 51 | 7 | 0 | -5.689732  | 2.905699  | 0.750756  |
| 52 | 8 | 0 | -2.254067  | 1.398922  | -3.066563 |
| 53 | 8 | 0 | -2.982736  | 2.568969  | 1.296303  |
| 54 | 6 | 0 | -10.203315 | 4.100065  | 2.249208  |
| 55 | 1 | 0 | -10.696356 | 5.043009  | 1.986592  |
| 56 | 1 | 0 | -10.995827 | 3.362010  | 2.418273  |
| 57 | 1 | 0 | -9.671327  | 4.247391  | 3.191769  |
| 58 | 6 | 0 | -11.189003 | 3.580072  | -0.494478 |
| 59 | 1 | 0 | -11.816365 | 2.935755  | 0.132242  |
| 60 | 1 | 0 | -11.511459 | 4.611175  | -0.308379 |
| 61 | 1 | 0 | -11.391303 | 3.342145  | -1.540635 |
| 62 | 6 | 0 | -7.045515  | 2.151475  | -3.231042 |
| 63 | 1 | 0 | -7.490152  | 3.060450  | -3.641506 |
| 64 | 1 | 0 | -6.191549  | 1.854688  | -3.830808 |
| 65 | 1 | 0 | -7.786842  | 1.349874  | -3.216200 |
| 66 | 6 | 0 | 9.618282   | -0.688882 | -0.171836 |
| 67 | 7 | 0 | 7.693408   | -0.763283 | -1.764338 |
| 68 | 6 | 0 | 5.409155   | -1.555792 | -2.105053 |

|     |   |   |           |           |           |
|-----|---|---|-----------|-----------|-----------|
| 69  | 6 | 0 | 5.998519  | -2.487407 | 2.447000  |
| 70  | 6 | 0 | 7.540570  | -2.424345 | 2.548628  |
| 71  | 6 | 0 | 6.908799  | -1.828028 | -2.049353 |
| 72  | 8 | 0 | 7.353629  | -2.968278 | -2.259107 |
| 73  | 1 | 0 | 10.706801 | -0.809930 | -0.147254 |
| 74  | 1 | 0 | 9.381781  | 0.310468  | 0.195423  |
| 75  | 1 | 0 | 7.251783  | 0.143156  | -1.620257 |
| 76  | 1 | 0 | 5.065793  | -1.776709 | -3.119678 |
| 77  | 1 | 0 | 5.186397  | -0.506590 | -1.890722 |
| 78  | 1 | 0 | 5.628758  | -3.167793 | 3.219355  |
| 79  | 1 | 0 | 5.573892  | -1.497681 | 2.633323  |
| 80  | 1 | 0 | 7.810442  | -2.225314 | 3.590732  |
| 81  | 1 | 0 | 7.970645  | -3.391359 | 2.273652  |
| 82  | 6 | 0 | 9.138308  | -0.862975 | -1.624531 |
| 83  | 1 | 0 | 9.437542  | -1.839819 | -2.008993 |
| 84  | 1 | 0 | 9.621943  | -0.094556 | -2.237770 |
| 85  | 8 | 0 | 5.744422  | -4.232827 | 0.807851  |
| 86  | 6 | 0 | 5.550071  | -3.046157 | 1.102643  |
| 87  | 7 | 0 | 4.958192  | -2.159165 | 0.254468  |
| 88  | 1 | 0 | 4.826496  | -1.198254 | 0.566768  |
| 89  | 6 | 0 | 4.650667  | -2.482879 | -1.133353 |
| 90  | 1 | 0 | 4.998400  | -3.507496 | -1.293595 |
| 91  | 6 | 0 | 3.146011  | -2.499158 | -1.467342 |
| 92  | 8 | 0 | 2.779646  | -2.704401 | -2.632272 |
| 93  | 7 | 0 | 2.292014  | -2.305296 | -0.439724 |
| 94  | 1 | 0 | 2.687754  | -2.135365 | 0.475490  |
| 95  | 6 | 0 | 0.843654  | -2.318594 | -0.583145 |
| 96  | 1 | 0 | 0.425108  | -1.525971 | 0.042376  |
| 97  | 1 | 0 | 0.604409  | -2.107261 | -1.626585 |
| 98  | 6 | 0 | 0.251014  | -3.679024 | -0.173622 |
| 99  | 1 | 0 | 0.629914  | -4.464393 | -0.825619 |
| 100 | 1 | 0 | 0.507707  | -3.905093 | 0.861885  |
| 101 | 6 | 0 | -1.943185 | -3.276639 | 0.831966  |
| 102 | 6 | 0 | -1.808379 | -4.082486 | -1.510109 |
| 103 | 6 | 0 | -3.422044 | -3.345881 | 0.671984  |
| 104 | 6 | 0 | -3.931627 | -3.793387 | -0.607326 |



|     |   |   |            |           |           |
|-----|---|---|------------|-----------|-----------|
| 105 | 6 | 0 | -5.524569  | -3.075829 | 1.540771  |
| 106 | 6 | 0 | -6.352217  | -2.715614 | 2.630347  |
| 107 | 6 | 0 | -6.124340  | -3.504969 | 0.322612  |
| 108 | 6 | 0 | -7.730592  | -2.768343 | 2.548518  |
| 109 | 1 | 0 | -5.859098  | -2.394193 | 3.542489  |
| 110 | 6 | 0 | -7.526337  | -3.557292 | 0.237410  |
| 111 | 6 | 0 | -8.325602  | -3.199694 | 1.319970  |
| 112 | 1 | 0 | -8.007047  | -3.880624 | -0.676817 |
| 113 | 7 | 0 | -1.217062  | -3.683750 | -0.274818 |
| 114 | 7 | 0 | -3.167975  | -4.132129 | -1.627456 |
| 115 | 7 | 0 | -5.298394  | -3.856560 | -0.733453 |
| 116 | 7 | 0 | -4.173372  | -3.005313 | 1.685516  |
| 117 | 8 | 0 | -1.062362  | -4.379752 | -2.446900 |
| 118 | 8 | 0 | -1.399902  | -2.895716 | 1.867341  |
| 119 | 6 | 0 | -8.587896  | -2.382420 | 3.727922  |
| 120 | 1 | 0 | -9.259105  | -1.552233 | 3.480182  |
| 121 | 1 | 0 | -9.219840  | -3.217062 | 4.052578  |
| 122 | 1 | 0 | -7.969307  | -2.076803 | 4.574768  |
| 123 | 6 | 0 | -9.824072  | -3.273265 | 1.189083  |
| 124 | 1 | 0 | -10.250352 | -3.956874 | 1.932414  |
| 125 | 1 | 0 | -10.283317 | -2.293150 | 1.362227  |
| 126 | 1 | 0 | -10.119896 | -3.619402 | 0.196680  |
| 127 | 6 | 0 | -5.894327  | -4.307938 | -2.002714 |
| 128 | 1 | 0 | -6.522651  | -3.514812 | -2.413066 |
| 129 | 1 | 0 | -5.088330  | -4.535020 | -2.692571 |
| 130 | 1 | 0 | -6.494824  | -5.202407 | -1.824601 |
| 131 | 7 | 0 | 7.412949   | 2.834297  | 1.910620  |
| 132 | 7 | 0 | 9.003331   | -1.637259 | 0.748649  |
| 133 | 1 | 0 | 9.208497   | -2.619775 | 0.624179  |
| 134 | 1 | 0 | 7.672322   | 1.848965  | 1.905995  |
| 135 | 8 | 0 | 7.810733   | -0.110312 | 1.951453  |
| 136 | 8 | 0 | 5.809235   | 4.346788  | 2.517625  |
| 137 | 6 | 0 | 6.264443   | 3.189723  | 2.529986  |
| 138 | 6 | 0 | 8.129607   | -1.289715 | 1.719280  |

**Table S5.** The coordinates of the optimized geometry of C3FES (120°)

| Center<br>Number | Atomic<br>Number | Atomic<br>Type | Coordinates (Angstroms) |           |          |
|------------------|------------------|----------------|-------------------------|-----------|----------|
|                  |                  |                | X                       | Y         | Z        |
| 1                | 6                | 0              | -1.929035               | -3.606740 | 3.703557 |
| 2                | 7                | 0              | 0.445989                | -4.278620 | 3.465087 |
| 3                | 6                | 0              | 2.637241                | -3.716727 | 2.576196 |
| 4                | 6                | 0              | 0.168157                | 0.198982  | 1.815709 |
| 5                | 6                | 0              | -1.279852               | -0.289890 | 1.929671 |
| 6                | 6                | 0              | 1.246294                | -4.296812 | 2.391455 |
| 7                | 8                | 0              | 0.908470                | -4.738552 | 1.311782 |
| 8                | 1                | 0              | -2.927182               | -4.028641 | 3.740504 |
| 9                | 1                | 0              | -1.734529               | -3.133355 | 4.659166 |
| 10               | 1                | 0              | 0.813146                | -3.912991 | 4.314685 |
| 11               | 1                | 0              | 3.346466                | -4.488112 | 2.310550 |
| 12               | 1                | 0              | 2.822678                | -3.429723 | 3.605317 |
| 13               | 1                | 0              | 0.188869                | 1.063274  | 1.161883 |
| 14               | 1                | 0              | 0.534029                | 0.511609  | 2.787148 |
| 15               | 1                | 0              | -1.899218               | 0.538950  | 2.251529 |
| 16               | 1                | 0              | -1.640954               | -0.628048 | 0.971806 |
| 17               | 6                | 0              | -0.929438               | -4.745503 | 3.471784 |
| 18               | 1                | 0              | -1.120211               | -5.229929 | 2.527904 |
| 19               | 1                | 0              | -1.049188               | -5.478741 | 4.259844 |
| 20               | 8                | 0              | 0.976595                | -1.147536 | 0.027514 |
| 21               | 6                | 0              | 1.074063                | -0.847220 | 1.196220 |
| 22               | 7                | 0              | 1.983477                | -1.411328 | 2.022269 |
| 23               | 1                | 0              | 1.946694                | -1.161719 | 2.986045 |
| 24               | 6                | 0              | 2.841035                | -2.515074 | 1.642537 |
| 25               | 1                | 0              | 2.563777                | -2.804454 | 0.639371 |
| 26               | 6                | 0              | 4.328823                | -2.154510 | 1.561398 |
| 27               | 8                | 0              | 5.137755                | -3.034805 | 1.349447 |
| 28               | 7                | 0              | 4.660212                | -0.869988 | 1.702755 |
| 29               | 1                | 0              | 3.931684                | -0.209793 | 1.847730 |
| 30               | 6                | 0              | 6.021780                | -0.381853 | 1.600133 |
| 31               | 1                | 0              | 6.116045                | 0.479038  | 2.248625 |
| 32               | 1                | 0              | 6.694691                | -1.150190 | 1.950375 |

|    |   |   |           |           |           |
|----|---|---|-----------|-----------|-----------|
| 33 | 6 | 0 | 6.363145  | 0.004790  | 0.161477  |
| 34 | 1 | 0 | 6.297303  | -0.854568 | -0.483487 |
| 35 | 1 | 0 | 5.683842  | 0.764245  | -0.191496 |
| 36 | 6 | 0 | 7.889276  | 1.895558  | 0.214873  |
| 37 | 6 | 0 | 8.779238  | -0.354931 | -0.186866 |
| 38 | 6 | 0 | 9.288105  | 2.377316  | 0.048121  |
| 39 | 6 | 0 | 10.294185 | 1.368974  | -0.233167 |
| 40 | 6 | 0 | 10.831951 | 4.058760  | -0.008955 |
| 41 | 6 | 0 | 11.127124 | 5.429865  | 0.102761  |
| 42 | 6 | 0 | 11.860570 | 3.161110  | -0.282634 |
| 43 | 6 | 0 | 12.403966 | 5.898607  | -0.051870 |
| 44 | 1 | 0 | 10.314156 | 6.100345  | 0.314541  |
| 45 | 6 | 0 | 13.168421 | 3.623604  | -0.443209 |
| 46 | 6 | 0 | 13.446735 | 4.967566  | -0.331785 |
| 47 | 1 | 0 | 13.955233 | 2.922119  | -0.653621 |
| 48 | 7 | 0 | 7.725028  | 0.545176  | 0.056583  |
| 49 | 7 | 0 | 10.053997 | 0.100518  | -0.335633 |
| 50 | 7 | 0 | 11.538037 | 1.829576  | -0.383725 |
| 51 | 7 | 0 | 9.548290  | 3.619896  | 0.151384  |
| 52 | 8 | 0 | 8.522583  | -1.530348 | -0.261687 |
| 53 | 8 | 0 | 6.978532  | 2.635941  | 0.464173  |
| 54 | 6 | 0 | 12.699911 | 7.374821  | 0.071980  |
| 55 | 1 | 0 | 13.409649 | 7.570426  | 0.869480  |
| 56 | 1 | 0 | 13.122819 | 7.771679  | -0.845491 |
| 57 | 1 | 0 | 11.793479 | 7.925951  | 0.288299  |
| 58 | 6 | 0 | 14.865337 | 5.447966  | -0.508019 |
| 59 | 1 | 0 | 14.933877 | 6.157596  | -1.326030 |
| 60 | 1 | 0 | 15.217236 | 5.949300  | 0.387757  |
| 61 | 1 | 0 | 15.530750 | 4.621146  | -0.718469 |
| 62 | 6 | 0 | 12.589538 | 0.842064  | -0.666685 |
| 63 | 1 | 0 | 12.849026 | 0.328883  | 0.235652  |
| 64 | 1 | 0 | 12.231979 | 0.137025  | -1.387774 |
| 65 | 1 | 0 | 13.452989 | 1.341485  | -1.053896 |
| 66 | 6 | 0 | 1.608012  | -5.296313 | -1.706191 |
| 67 | 7 | 0 | 0.919563  | -2.980015 | -2.262817 |
| 68 | 6 | 0 | -0.919809 | -1.410280 | -2.507933 |

|     |   |   |           |           |           |
|-----|---|---|-----------|-----------|-----------|
| 69  | 6 | 0 | -2.992810 | -5.153455 | -0.584707 |
| 70  | 6 | 0 | -1.982848 | -6.273438 | -0.857337 |
| 71  | 6 | 0 | -0.051998 | -2.525004 | -3.064402 |
| 72  | 8 | 0 | -0.260694 | -2.961794 | -4.178230 |
| 73  | 1 | 0 | 2.336700  | -6.050683 | -1.981144 |
| 74  | 1 | 0 | 1.780871  | -5.031994 | -0.669191 |
| 75  | 1 | 0 | 1.028894  | -2.550470 | -1.371837 |
| 76  | 1 | 0 | -0.855579 | -0.577917 | -3.194701 |
| 77  | 1 | 0 | -0.572480 | -1.072948 | -1.537667 |
| 78  | 1 | 0 | -3.981409 | -5.592015 | -0.512211 |
| 79  | 1 | 0 | -2.773600 | -4.675967 | 0.363578  |
| 80  | 1 | 0 | -2.090011 | -7.029056 | -0.088091 |
| 81  | 1 | 0 | -2.178582 | -6.734570 | -1.811955 |
| 82  | 6 | 0 | 1.819424  | -4.069182 | -2.600143 |
| 83  | 1 | 0 | 1.659543  | -4.323404 | -3.635411 |
| 84  | 1 | 0 | 2.841755  | -3.729626 | -2.488077 |
| 85  | 8 | 0 | -3.497728 | -4.431189 | -2.795524 |
| 86  | 6 | 0 | -3.038279 | -4.142094 | -1.713447 |
| 87  | 7 | 0 | -2.541183 | -2.916254 | -1.434482 |
| 88  | 1 | 0 | -2.114275 | -2.784719 | -0.543992 |
| 89  | 6 | 0 | -2.382829 | -1.867719 | -2.421071 |
| 90  | 1 | 0 | -2.674236 | -2.280815 | -3.375736 |
| 91  | 6 | 0 | -3.302780 | -0.660331 | -2.206588 |
| 92  | 8 | 0 | -3.174357 | 0.312660  | -2.921434 |
| 93  | 7 | 0 | -4.228062 | -0.752821 | -1.249979 |
| 94  | 1 | 0 | -4.281477 | -1.596608 | -0.727679 |
| 95  | 6 | 0 | -5.194285 | 0.291963  | -0.971573 |
| 96  | 1 | 0 | -5.426953 | 0.256757  | 0.084451  |
| 97  | 1 | 0 | -4.745776 | 1.249067  | -1.192063 |
| 98  | 6 | 0 | -6.466935 | 0.101546  | -1.796109 |
| 99  | 1 | 0 | -6.245151 | 0.162918  | -2.847706 |
| 100 | 1 | 0 | -6.908375 | -0.859084 | -1.583666 |
| 101 | 6 | 0 | -8.359420 | 0.866899  | -0.477145 |
| 102 | 6 | 0 | -7.450511 | 2.322433  | -2.230267 |
| 103 | 6 | 0 | -9.375650 | 1.931073  | -0.250364 |
| 104 | 6 | 0 | -9.285221 | 3.107732  | -1.096161 |

|     |   |   |            |           |           |
|-----|---|---|------------|-----------|-----------|
| 105 | 6 | 0 | -11.200236 | 2.753988  | 0.848576  |
| 106 | 6 | 0 | -12.186823 | 2.592089  | 1.838511  |
| 107 | 6 | 0 | -11.189763 | 3.916043  | 0.081598  |
| 108 | 6 | 0 | -13.135548 | 3.553144  | 2.062672  |
| 109 | 1 | 0 | -12.171400 | 1.685523  | 2.415757  |
| 110 | 6 | 0 | -12.150894 | 4.905767  | 0.298007  |
| 111 | 6 | 0 | -13.112153 | 4.737581  | 1.269500  |
| 112 | 1 | 0 | -12.133457 | 5.799336  | -0.299204 |
| 113 | 7 | 0 | -7.470085  | 1.128567  | -1.485202 |
| 114 | 7 | 0 | -8.385815  | 3.287553  | -2.010436 |
| 115 | 7 | 0 | -10.212081 | 4.042650  | -0.875133 |
| 116 | 7 | 0 | -10.265457 | 1.778235  | 0.648107  |
| 117 | 8 | 0 | -6.590591  | 2.463349  | -3.063187 |
| 118 | 8 | 0 | -8.327605  | -0.142006 | 0.171599  |
| 119 | 6 | 0 | -14.186410 | 3.359940  | 3.130609  |
| 120 | 1 | 0 | -14.137481 | 4.143471  | 3.880062  |
| 121 | 1 | 0 | -15.186332 | 3.374314  | 2.708650  |
| 122 | 1 | 0 | -14.047972 | 2.409701  | 3.630649  |
| 123 | 6 | 0 | -14.141504 | 5.817693  | 1.488758  |
| 124 | 1 | 0 | -15.144305 | 5.431885  | 1.337244  |
| 125 | 1 | 0 | -14.089929 | 6.199944  | 2.503058  |
| 126 | 1 | 0 | -13.987985 | 6.643085  | 0.806223  |
| 127 | 6 | 0 | -10.155912 | 5.253092  | -1.707343 |
| 128 | 1 | 0 | -9.373650  | 5.892350  | -1.354757 |
| 129 | 1 | 0 | -9.961751  | 4.978803  | -2.723200 |
| 130 | 1 | 0 | -11.091449 | 5.769195  | -1.649827 |
| 131 | 7 | 0 | -1.907874  | -2.595897 | 2.571765  |
| 132 | 7 | 0 | 0.231909   | -5.906596 | -1.898800 |
| 133 | 1 | 0 | -0.100450  | -6.517523 | -3.067520 |
| 134 | 1 | 0 | -2.352951  | -2.931532 | 1.331259  |
| 135 | 8 | 0 | -0.311742  | -5.416782 | -0.127502 |
| 136 | 8 | 0 | -1.187561  | -1.231363 | 3.708497  |
| 137 | 6 | 0 | -1.411493  | -1.386104 | 2.871652  |
| 138 | 6 | 0 | -0.616689  | -5.783683 | -0.866955 |

**Table S6.** The coordinates of the optimized geometry of C3FES (240°)

| Center<br>Number | Atomic<br>Number | Atomic<br>Type | Coordinates (Angstroms) |           |          |
|------------------|------------------|----------------|-------------------------|-----------|----------|
|                  |                  |                | X                       | Y         | Z        |
| 1                | 6                | 0              | 1.700436                | -4.467961 | 3.805188 |
| 2                | 7                | 0              | 1.141007                | -2.113893 | 3.207321 |
| 3                | 6                | 0              | -0.538152               | -0.627183 | 2.236161 |
| 4                | 6                | 0              | -2.860374               | -4.698450 | 2.504098 |
| 5                | 6                | 0              | -1.741529               | -5.742164 | 2.681340 |
| 6                | 6                | 0              | 0.611217                | -1.612507 | 2.069959 |
| 7                | 8                | 0              | 1.010799                | -1.925387 | 0.937201 |
| 8                | 1                | 0              | 2.554235                | -5.151352 | 3.857895 |
| 9                | 1                | 0              | 1.319245                | -4.336390 | 4.822796 |
| 10               | 1                | 0              | 0.757900                | -1.796699 | 4.088044 |
| 11               | 1                | 0              | -0.247294               | 0.313251  | 1.761530 |
| 12               | 1                | 0              | -0.750975               | -0.417976 | 3.289757 |
| 13               | 1                | 0              | -3.713334               | -5.190844 | 2.026081 |
| 14               | 1                | 0              | -3.194392               | -4.336128 | 3.481356 |
| 15               | 1                | 0              | -2.144572               | -6.600956 | 3.226883 |
| 16               | 1                | 0              | -1.384221               | -6.089309 | 1.711613 |
| 17               | 6                | 0              | 2.198884                | -3.119365 | 3.252121 |
| 18               | 1                | 0              | 2.577271                | -3.240218 | 2.237089 |
| 19               | 1                | 0              | 3.013899                | -2.753575 | 3.883367 |
| 20               | 8                | 0              | -2.191290               | -3.733597 | 0.402078 |
| 21               | 6                | 0              | -2.435574               | -3.550591 | 1.600784 |
| 22               | 7                | 0              | -2.344319               | -2.324826 | 2.191551 |
| 23               | 1                | 0              | -2.472920               | -2.281923 | 3.195194 |
| 24               | 6                | 0              | -1.804980               | -1.144235 | 1.525870 |
| 25               | 1                | 0              | -1.530048               | -1.461606 | 0.515690 |
| 26               | 6                | 0              | -2.824445               | -0.001049 | 1.336282 |
| 27               | 8                | 0              | -2.436451               | 1.098586  | 0.924190 |
| 28               | 7                | 0              | -4.115929               | -0.285132 | 1.608256 |
| 29               | 1                | 0              | -4.341981               | -1.221627 | 1.916519 |
| 30               | 6                | 0              | -5.202925               | 0.661296  | 1.394100 |
| 31               | 1                | 0              | -5.931711               | 0.539888  | 2.199108 |
| 32               | 1                | 0              | -4.787388               | 1.669027  | 1.442891 |

|    |   |   |            |           |           |
|----|---|---|------------|-----------|-----------|
| 33 | 6 | 0 | -5.878506  | 0.435493  | 0.029267  |
| 34 | 1 | 0 | -5.154259  | 0.568429  | -0.772472 |
| 35 | 1 | 0 | -6.301142  | -0.568759 | -0.019530 |
| 36 | 6 | 0 | -8.232806  | 1.054929  | 0.272056  |
| 37 | 6 | 0 | -6.680078  | 2.607325  | -0.883461 |
| 38 | 6 | 0 | -9.300278  | 2.048541  | -0.028015 |
| 39 | 6 | 0 | -8.914833  | 3.237614  | -0.758504 |
| 40 | 6 | 0 | -11.493797 | 2.698844  | 0.092699  |
| 41 | 6 | 0 | -12.816652 | 2.438502  | 0.522179  |
| 42 | 6 | 0 | -11.218376 | 3.895199  | -0.629343 |
| 43 | 6 | 0 | -13.854280 | 3.312246  | 0.259633  |
| 44 | 1 | 0 | -12.987920 | 1.516899  | 1.069728  |
| 45 | 6 | 0 | -12.273248 | 4.784706  | -0.897158 |
| 46 | 6 | 0 | -13.569285 | 4.511515  | -0.468292 |
| 47 | 1 | 0 | -12.091749 | 5.700523  | -1.444776 |
| 48 | 7 | 0 | -6.974781  | 1.389416  | -0.200539 |
| 49 | 7 | 0 | -7.682428  | 3.494675  | -1.151098 |
| 50 | 7 | 0 | -9.916710  | 4.134562  | -1.040365 |
| 51 | 7 | 0 | -10.516843 | 1.795522  | 0.376869  |
| 52 | 8 | 0 | -5.512562  | 2.822164  | -1.220070 |
| 53 | 8 | 0 | -8.443767  | 0.011156  | 0.887229  |
| 54 | 6 | 0 | -15.255236 | 3.008704  | 0.728196  |
| 55 | 1 | 0 | -15.628505 | 3.787336  | 1.403364  |
| 56 | 1 | 0 | -15.954956 | 2.954859  | -0.113705 |
| 57 | 1 | 0 | -15.289550 | 2.054759  | 1.259222  |
| 58 | 6 | 0 | -14.672045 | 5.489389  | -0.776899 |
| 59 | 1 | 0 | -15.462389 | 5.016193  | -1.371187 |
| 60 | 1 | 0 | -15.144525 | 5.853009  | 0.142940  |
| 61 | 1 | 0 | -14.295506 | 6.350712  | -1.332240 |
| 62 | 6 | 0 | -9.605256  | 5.364159  | -1.789567 |
| 63 | 1 | 0 | -9.856168  | 6.235473  | -1.181275 |
| 64 | 1 | 0 | -8.543766  | 5.363086  | -2.013659 |
| 65 | 1 | 0 | -10.181288 | 5.380694  | -2.716972 |
| 66 | 6 | 0 | -1.154376  | -6.199523 | -1.998670 |
| 67 | 7 | 0 | 1.184664   | -6.195124 | -1.134863 |
| 68 | 6 | 0 | 3.269744   | -4.953789 | -0.895297 |

|     |   |   |           |           |           |
|-----|---|---|-----------|-----------|-----------|
| 69  | 6 | 0 | 0.299061  | -1.720349 | -2.564633 |
| 70  | 6 | 0 | -0.870738 | -2.550178 | -3.130498 |
| 71  | 6 | 0 | 2.356407  | -5.855799 | -1.718451 |
| 72  | 8 | 0 | 2.693817  | -6.226780 | -2.854901 |
| 73  | 1 | 0 | -1.892040 | -6.874776 | -2.445847 |
| 74  | 1 | 0 | -1.548731 | -5.861068 | -1.036102 |
| 75  | 1 | 0 | 1.016810  | -5.889327 | -0.178542 |
| 76  | 1 | 0 | 4.240092  | -5.449035 | -0.807959 |
| 77  | 1 | 0 | 2.874091  | -4.795154 | 0.112269  |
| 78  | 1 | 0 | 0.338510  | -0.773568 | -3.114357 |
| 79  | 1 | 0 | 0.124563  | -1.488505 | -1.510193 |
| 80  | 1 | 0 | -1.782167 | -1.944379 | -3.083977 |
| 81  | 1 | 0 | -0.684831 | -2.805805 | -4.174393 |
| 82  | 6 | 0 | 0.151719  | -6.990733 | -1.788789 |
| 83  | 1 | 0 | 0.550438  | -7.324587 | -2.747311 |
| 84  | 1 | 0 | -0.064421 | -7.875013 | -1.179642 |
| 85  | 8 | 0 | 2.109460  | -2.615234 | -3.882191 |
| 86  | 6 | 0 | 1.641486  | -2.413582 | -2.753868 |
| 87  | 7 | 0 | 2.278076  | -2.792897 | -1.609246 |
| 88  | 1 | 0 | 1.811716  | -2.621397 | -0.718837 |
| 89  | 6 | 0 | 3.489815  | -3.602626 | -1.607278 |
| 90  | 1 | 0 | 3.730201  | -3.801079 | -2.656807 |
| 91  | 6 | 0 | 4.724221  | -2.879289 | -1.029077 |
| 92  | 8 | 0 | 5.765187  | -3.509801 | -0.802546 |
| 93  | 7 | 0 | 4.605014  | -1.548823 | -0.827753 |
| 94  | 1 | 0 | 3.721685  | -1.115134 | -1.061200 |
| 95  | 6 | 0 | 5.697758  | -0.710166 | -0.355403 |
| 96  | 1 | 0 | 5.272809  | 0.106329  | 0.233367  |
| 97  | 1 | 0 | 6.338894  | -1.312920 | 0.290651  |
| 98  | 6 | 0 | 6.521123  | -0.143308 | -1.526771 |
| 99  | 1 | 0 | 6.972277  | -0.956290 | -2.093102 |
| 100 | 1 | 0 | 5.883258  | 0.451752  | -2.180840 |
| 101 | 6 | 0 | 7.331072  | 2.077828  | -0.894528 |
| 102 | 6 | 0 | 8.875332  | 0.140500  | -0.772458 |
| 103 | 6 | 0 | 8.485459  | 2.906030  | -0.448593 |
| 104 | 6 | 0 | 9.740028  | 2.224173  | -0.208785 |



|     |   |   |           |           |           |
|-----|---|---|-----------|-----------|-----------|
| 105 | 6 | 0 | 9.362472  | 4.948768  | 0.105276  |
| 106 | 6 | 0 | 9.186438  | 6.343217  | 0.267386  |
| 107 | 6 | 0 | 10.638236 | 4.372874  | 0.367073  |
| 108 | 6 | 0 | 10.218976 | 7.167013  | 0.672879  |
| 109 | 1 | 0 | 8.200207  | 6.746047  | 0.058596  |
| 110 | 6 | 0 | 11.689341 | 5.209625  | 0.779885  |
| 111 | 6 | 0 | 11.498474 | 6.580227  | 0.933766  |
| 112 | 1 | 0 | 12.668679 | 4.796509  | 0.983422  |
| 113 | 7 | 0 | 7.607416  | 0.730202  | -1.054831 |
| 114 | 7 | 0 | 9.913366  | 0.925713  | -0.359697 |
| 115 | 7 | 0 | 10.792636 | 3.005357  | 0.203011  |
| 116 | 7 | 0 | 8.306296  | 4.191682  | -0.297887 |
| 117 | 8 | 0 | 8.998159  | -1.078961 | -0.914977 |
| 118 | 8 | 0 | 6.215829  | 2.548331  | -1.111759 |
| 119 | 6 | 0 | 10.000894 | 8.650450  | 0.836014  |
| 120 | 1 | 0 | 10.206705 | 8.974886  | 1.862526  |
| 121 | 1 | 0 | 10.663719 | 9.226823  | 0.180472  |
| 122 | 1 | 0 | 8.969828  | 8.919942  | 0.596291  |
| 123 | 6 | 0 | 12.650686 | 7.442521  | 1.377446  |
| 124 | 1 | 0 | 12.870955 | 8.217774  | 0.634499  |
| 125 | 1 | 0 | 12.416064 | 7.961047  | 2.314321  |
| 126 | 1 | 0 | 13.554470 | 6.849604  | 1.531746  |
| 127 | 6 | 0 | 12.100875 | 2.384353  | 0.473195  |
| 128 | 1 | 0 | 12.381598 | 2.564650  | 1.512960  |
| 129 | 1 | 0 | 12.011802 | 1.318152  | 0.293499  |
| 130 | 1 | 0 | 12.852415 | 2.812818  | -0.193151 |
| 131 | 7 | 0 | 0.657020  | -5.103093 | 2.895771  |
| 132 | 7 | 0 | -0.961862 | -5.026684 | -2.953647 |
| 133 | 8 | 0 | -1.425264 | -3.718102 | -1.212392 |
| 134 | 8 | 0 | -0.773289 | -4.837907 | 4.574679  |
| 135 | 6 | 0 | -0.592795 | -5.206511 | 3.404571  |
| 136 | 6 | 0 | -1.080535 | -3.795757 | -2.400976 |
| 137 | 1 | 0 | -0.741417 | -5.181901 | -3.937371 |
| 138 | 1 | 0 | 0.902117  | -5.411089 | 1.954779  |

## Reference

- S1. Daniil M. I.; Mikhail A. K.; Alexander S. Novikov, Ivan V. A.; Anna A. R.; Vadim P. B.; Matti H.; Vadim Y. K.,  $\text{H}_2\text{C}(\text{X})-\text{X}\cdots\text{X}-$  (X = Cl, Br) Halogen Bonding of Dihalomethanes. *Cryst. Growth. Des.*, **2017**, *17* (3), 1353–1362.
- S2. Isita J.; Prem K. C.; Sameh H. A.; Tadhg P. B., A Remarkable Oxidative Cascade That Replaces the Riboflavin C8 Methyl with an Amino Group during Roseoflavin Biosynthesis. *J. Am. Chem. Soc.*, **2016**, *138* (27), 8324–8327
- S3. Michael U. L.; Cam-Van T. V.; Jeffrey W. B., SnAP Reagents for the Synthesis of Piperazines and Morpholines. *Org. Lett.*, **2014**, *16* (4), 1236–1239.
- S4. Robert E.; Thomas C., Efficient Light-Dependent DNA Repair Requires a Large Cofactor Separation. *J. Am. Chem. Soc.*, **1999**, *121* (32), 7318–7329.
- S5. Christoph B.; Matthias O.; Thomas C., Excess Electron Transfer in Flavin-Capped DNA-Hairpins. *Eur. J. Org. Chem.*, **2002**, *19*, 3281–3289.
